# Supplementary material for: Computational predictions on Brønsted acidic ionic liquid-catalyzed carbon dioxide conversion to five-membered heterocyclic carbonyl derivatives
Source: Royal Society of Chemistry journal article supplement (doi:10.1039/d2cp05877d), 2023-01-01
Supplement: d2cp05877d1.pdf [file d2cp05877d1.pdf]

## SUPPORTING INFORMATION

### **Computational predictions on Brønsted acidic ionic liquid catalyzed carbon dioxide conversion to five-membered heterocyclic carbonyl derivatives**

Yusif Abdullayev<sup>a,b\*</sup>, Nazani Karimova<sup>a</sup>, Leonardo A. Schenberg<sup>c</sup>, Lucas C. Ducati<sup>c</sup> and Jochen Autschbach<sup>d</sup>

<sup>a</sup> Department of Chemical Engineering, Baku Engineering University, Hasan Aliyev str. 120, Baku, Absheron, AZ0101, Azerbaijan

<sup>b</sup> Institute of Petrochemical Processes, Azerbaijan National Academy of Sciences, Hojaly ave. 30, Baku, AZ1025, Azerbaijan

<sup>c</sup> Department of Fundamental Chemistry Institute of Chemistry, University of São Paulo Av. Prof. Lineu Prestes, 748 05508-000, São Paulo, SP, Brazil

<sup>d</sup> Department of Chemistry, University at Buffalo, State University of New York, Buffalo, NY 14260-3000, United States

E-mail: yabdullayev@beu.edu.az

## Table of contents

|    |                                                                                                     |        |
|----|-----------------------------------------------------------------------------------------------------|--------|
| 1. | EDA+CO <sub>2</sub> free energy profile at different temperatures (Figure S1)                       | S03-05 |
| 2. | Relative Free energies (kcal/mol) for CO <sub>2</sub> cyclocondensation<br>using various substrates | S3-10  |
| 3. | Natural charges of some crucial atoms involved in TS1 <sub>EDA</sub> and substrates                 | S11    |
| 4. | Cartesian coordinates of the optimized structures                                                   | S12-26 |

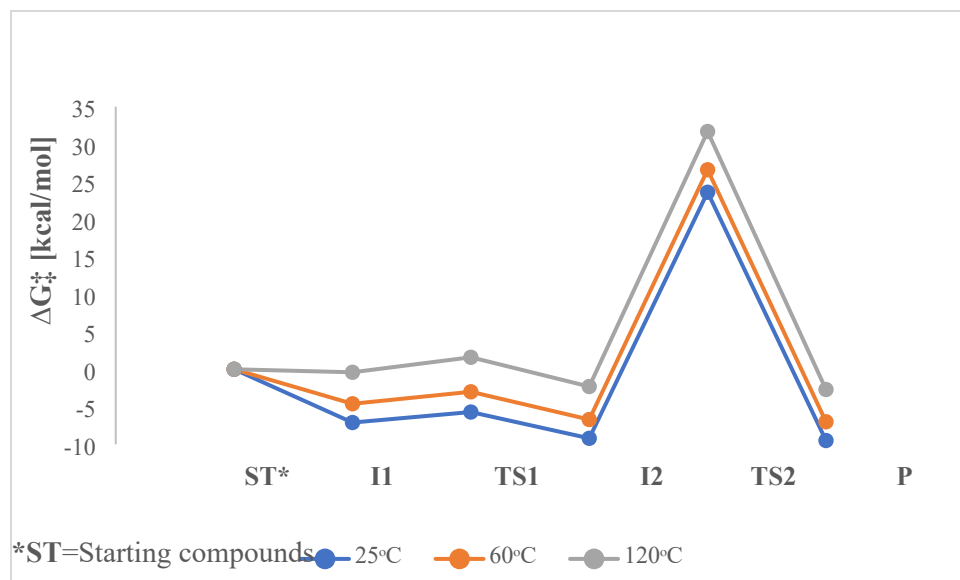

**Figure S1.** The calculated EDA+CO<sub>2</sub> reaction profile in different temperatures.

**Table S1.** Relative energies (kcal/mol) for EDA+ CO<sub>2</sub> cyclocondensation in gas phase at 298.15 K.

| Structure                                             | Energies in gas phase |                     |                     |                     | Relative energies |          |       |      |
|-------------------------------------------------------|-----------------------|---------------------|---------------------|---------------------|-------------------|----------|-------|------|
|                                                       | (E+ZPC)               | Etot                | H                   | G                   | ΔE                | Δ(E+ZPC) | ΔH    | ΔG   |
| CO <sub>2</sub>                                       | -188.495463           | -188.492845         | -188.491901         | -188.51616          |                   |          |       |      |
| EDA                                                   | -190.291824           | -190.287271         | -190.286327         | -190.318806         |                   |          |       |      |
| [Et <sub>2</sub> NH <sub>2</sub> ][HSO <sub>4</sub> ] | -913.576638           | -913.563678         | -913.562733         | -913.617485         |                   |          |       |      |
| <b>SUM</b>                                            | <b>-1292.363925</b>   | <b>-1292.343794</b> | <b>-1292.340961</b> | <b>-1292.452451</b> |                   |          |       |      |
| <b>I1<sub>EDA</sub></b>                               | -1292.408494          | -1292.386910        | -1292.385965        | -1292.463699        |                   |          |       |      |
|                                                       | -0.044569             | -0.043116           | -0.045004           | -0.011248           | -28.0             | -27.1    | -28.2 | -7.1 |
| <b>TS1<sub>EDA</sub></b>                              | -1292.408306          | -1292.387815        | -1292.386871        | -1292.461551        |                   |          |       |      |
|                                                       | -0.044381             | -0.044021           | -0.045910           | -0.009100           | -27.8             | -27.6    | -28.8 | -5.7 |
| <b>I2<sub>EDA</sub></b>                               | -1292.413135          | -1292.39176         | -1292.390816        | -1292.467181        |                   |          |       |      |
|                                                       | -0.049210             | -0.047966           | -0.049855           | -0.014730           | -30.9             | -30.1    | -31.3 | -9.2 |
| <b>TS2<sub>EDA</sub></b>                              | -1292.364827          | -1292.345092        | -1292.344148        | -1292.41484         |                   |          |       |      |
|                                                       | -0.000902             | -0.001298           | -0.003187           | 0.037611            | -0.6              | -0.8     | -2.0  | 23.6 |
| <b>P<sub>EDA</sub></b>                                | -1292.413637          | -1292.391592        | -1292.390648        | -1292.467612        |                   |          |       |      |
|                                                       | -0.049712             | -0.047798           | -0.049687           | -0.015161           | -31.2             | -30.0    | -31.2 | -9.5 |

**Table S2.** Relative energies (kcal/mol) for EDA+CO<sub>2</sub> cyclocondensation in the presence of n-hexane at 298.15 K.

| Structure                                             | Energies in solvent (n-hexane) |                     |                     |                     | Relative energies |          |       |      |
|-------------------------------------------------------|--------------------------------|---------------------|---------------------|---------------------|-------------------|----------|-------|------|
|                                                       | (E+ZPC)                        | Etot                | H                   | G                   | ΔE                | Δ(E+ZPC) | ΔH    | ΔG   |
| CO <sub>2</sub>                                       | -188.496425                    | -188.493319         | -188.492238         | -188.520664         |                   |          |       |      |
| EDA                                                   | -190.294548                    | -190.288895         | -190.287815         | -190.326308         |                   |          |       |      |
| [Et <sub>2</sub> NH <sub>2</sub> ][HSO <sub>4</sub> ] | -913.586907                    | -913.570719         | -913.569639         | -913.636279         |                   |          |       |      |
| <b>SUM</b>                                            | <b>-1292.377880</b>            | <b>-1292.352933</b> | <b>-1292.349692</b> | <b>-1292.483251</b> |                   |          |       |      |
| <b>I1<sub>EDA</sub></b>                               | -1292.421984                   | -1292.395046        | -1292.393965        | -1292.488656        |                   |          |       |      |
|                                                       | -0.044104                      | -0.042113           | -0.044273           | -0.005405           | -27.7             | -26.4    | -27.8 | -3.4 |
| <b>TS1<sub>EDA</sub></b>                              | -1292.418437                   | -1292.393069        | -1292.391988        | -1292.481637        |                   |          |       |      |
|                                                       | -0.040557                      | -0.040136           | -0.042296           | 0.001614            | -25.4             | -25.2    | -26.5 | 1.0  |
| <b>I2<sub>EDA</sub></b>                               | -1292.425678                   | -1292.398717        | -1292.397637        | -1292.491991        |                   |          |       |      |
|                                                       | -0.047798                      | -0.045784           | -0.047945           | -0.008740           | -30.0             | -28.7    | -30.1 | -5.5 |
| <b>TS2<sub>EDA</sub></b>                              | -1292.37713                    | -1292.352233        | -1292.351153        | -1292.437762        |                   |          |       |      |
|                                                       | 0.000750                       | 0.000700            | -0.001461           | 0.045489            | 0.5               | 0.4      | -0.9  | 28.5 |
| <b>P<sub>EDA</sub></b>                                | -1292.425763                   | -1292.398094        | -1292.397013        | -1292.4919          |                   |          |       |      |
|                                                       | -0.047883                      | -0.045161           | -0.047321           | -0.008649           | -30.0             | -28.3    | -29.7 | -5.4 |

**Table S3.** Relative energies (kcal/mol) for EDA+CO<sub>2</sub> cyclocondensation in the presence of THF at 298.15 K.

| Structure                                             | Energies in solvent (THF) |                     |                     |                     | Relative energies |          |       |      |
|-------------------------------------------------------|---------------------------|---------------------|---------------------|---------------------|-------------------|----------|-------|------|
|                                                       | (E+ZPC)                   | Etot                | H                   | G                   | ΔE                | Δ(E+ZPC) | ΔH    | ΔG   |
| CO <sub>2</sub>                                       | -188.497632               | -188.494416         | -188.493308         | -188.522625         |                   |          |       |      |
| EDA                                                   | -190.298267               | -190.292383         | -190.291274         | -190.33103          |                   |          |       |      |
| [Et <sub>2</sub> NH <sub>2</sub> ][HSO <sub>4</sub> ] | -913.600555               | -913.583635         | -913.582526         | -913.652024         |                   |          |       |      |
| <b>SUM</b>                                            | <b>-1292.396454</b>       | <b>-1292.370434</b> | <b>-1292.367108</b> | <b>-1292.505679</b> |                   |          |       |      |
| <b>I1<sub>EDA</sub></b>                               | -1292.440265              | -1292.412049        | -1292.410940        | -1292.510020        |                   |          |       |      |
|                                                       | -0.043811                 | -0.041615           | -0.043832           | -0.004341           | -27.5             | -26.1    | -27.5 | -2.7 |
| <b>TS1<sub>EDA</sub></b>                              | -1292.437270              | -1292.410307        | -1292.409198        | -1292.503992        |                   |          |       |      |
|                                                       | -0.040816                 | -0.039873           | -0.042090           | 0.001687            | -25.6             | -25.0    | -26.4 | 1.1  |
| <b>I2<sub>EDA</sub></b>                               | -1292.442282              | -1292.413859        | -1292.41275         | -1292.513177        |                   |          |       |      |
|                                                       | -0.045828                 | -0.043425           | -0.045642           | -0.007498           | -28.8             | -27.2    | -28.6 | -4.7 |
| <b>TS2<sub>EDA</sub></b>                              | -1292.394757              | -1292.368535        | -1292.367426        | -1292.458383        |                   |          |       |      |
|                                                       | 0.001697                  | 0.001899            | -0.000318           | 0.047296            | 1.1               | 1.2      | -0.2  | 29.7 |
| <b>P<sub>EDA</sub></b>                                | -1292.442432              | -1292.413189        | -1292.41208         | -1292.512364        |                   |          |       |      |
|                                                       | -0.045978                 | -0.042755           | -0.044972           | -0.006685           | -28.9             | -26.8    | -28.2 | -4.2 |

**Table S4.** Relative energies (kcal/mol) for EDA+CO<sub>2</sub> cyclocondensation in the presence of acetonitrile at 298.15 K.

| Structure                | Energies in solvent (Acetonitrile) |                     |                     |                     | Relative energies |          |       |      |
|--------------------------|------------------------------------|---------------------|---------------------|---------------------|-------------------|----------|-------|------|
|                          | (E+ZPC)                            | Etot                | H                   | G                   | ΔE                | Δ(E+ZPC) | ΔH    | ΔG   |
| CO2                      | -188.498054                        | -188.494778         | -188.493654         | -188.523467         |                   |          |       |      |
| EDA                      | -190.299684                        | -190.293669         | -190.292544         | -190.333005         |                   |          |       |      |
| [Et2NH2][HSO4]           | -913.605673                        | -913.588389         | -913.587264         | -913.656987         |                   |          |       |      |
| <b>SUM</b>               | <b>-1292.403411</b>                | <b>-1292.376836</b> | <b>-1292.373462</b> | <b>-1292.513459</b> |                   |          |       |      |
| <b>I1<sub>EDA</sub></b>  | -1292.447615                       | -1292.418467        | -1292.417342        | -1292.519996        |                   |          |       |      |
|                          | -0.044204                          | -0.041631           | -0.043880           | -0.006537           | -27.7             | -26.1    | -27.5 | -4.1 |
| <b>TS1<sub>EDA</sub></b> | -1292.443919                       | -1292.416218        | -1292.415093        | -1292.511830        |                   |          |       |      |
|                          | -0.040508                          | -0.039382           | -0.041631           | 0.001629            | -25.4             | -24.7    | -26.1 | 1.0  |
| <b>I2<sub>EDA</sub></b>  | -1292.448404                       | -1292.419305        | -1292.41818         | -1292.520241        |                   |          |       |      |
|                          | -0.044993                          | -0.042469           | -0.044718           | -0.006782           | -28.2             | -26.6    | -28.1 | -4.3 |
| <b>TS2<sub>EDA</sub></b> | -1292.402339                       | -1292.383122        | -1292.382177        | -1292.452013        |                   |          |       |      |
|                          | 0.001072                           | -0.006286           | -0.008715           | 0.061446            | 0.7               | -3.9     | -5.5  | 38.6 |
| <b>P<sub>EDA</sub></b>   | -1292.453651                       | -1292.424336        | -1292.423211        | -1292.523746        |                   |          |       |      |
|                          | -0.050240                          | -0.047500           | -0.049749           | -0.010287           | -31.5             | -29.8    | -31.2 | -6.5 |

**Table S5.** Relative energies (kcal/mol) for EDA+CO<sub>2</sub> cyclocondensation in the presence of methanol at 298.15 K.

| Structure                | Energies in solvent (methanol) |                     |                     |                     | Relative energies |          |       |      |
|--------------------------|--------------------------------|---------------------|---------------------|---------------------|-------------------|----------|-------|------|
|                          | (E+ZPC)                        | Etot                | H                   | G                   | ΔE                | Δ(E+ZPC) | ΔH    | ΔG   |
| CO2                      | -188.498043                    | -188.494827         | -188.493718         | -188.523036         |                   |          |       |      |
| EDA                      | -190.299642                    | -190.293763         | -190.292654         | -190.332402         |                   |          |       |      |
| [Et2NH2][HSO4]           | -913.600554                    | -913.583635         | -913.582526         | -913.652023         |                   |          |       |      |
| <b>SUM</b>               | <b>-1292.398239</b>            | <b>-1292.372225</b> | <b>-1292.368898</b> | <b>-1292.507461</b> |                   |          |       |      |
| <b>I1<sub>EDA</sub></b>  | -1292.447431                   | -1292.418945        | -1292.417837        | -1292.518802        |                   |          |       |      |
|                          | -0.049192                      | -0.046720           | -0.048939           | -0.011341           | -30.9             | -29.3    | -30.7 | -7.1 |
| <b>TS1<sub>EDA</sub></b> | -1292.443741                   | -1292.416700        | -1292.415591        | -1292.510296        |                   |          |       |      |
|                          | -0.045502                      | -0.044475           | -0.046693           | -0.002835           | -28.6             | -27.9    | -29.3 | -1.8 |
| <b>I2<sub>EDA</sub></b>  | -1292.448224                   | -1292.419814        | -1292.418705        | -1292.518437        |                   |          |       |      |
|                          | -0.049985                      | -0.047589           | -0.049807           | -0.010976           | -31.4             | -29.9    | -31.3 | -6.9 |
| <b>TS2<sub>EDA</sub></b> | -1292.40213                    | -1292.381984        | -1292.38104         | -1292.455615        |                   |          |       |      |
|                          | -0.003891                      | -0.009759           | -0.012142           | 0.051846            | -2.4              | -6.1     | -7.6  | 32.5 |
| <b>P<sub>EDA</sub></b>   | -1292.453464                   | -1292.431568        | -1292.430624        | -1292.508041        |                   |          |       |      |
|                          | -0.055225                      | -0.059343           | -0.061726           | -0.000580           | -34.7             | -37.2    | -38.7 | -0.4 |

**Table S6.** Relative energies (kcal/mol) for (CH<sub>3</sub>)<sub>2</sub>N-EDA+CO<sub>2</sub> cyclocondensation in gas phase at 298.15 K.

| Structure                                             | Energies in gas phase |                     |                     |                     | Relative energies |          |       |      |
|-------------------------------------------------------|-----------------------|---------------------|---------------------|---------------------|-------------------|----------|-------|------|
|                                                       | (E+ZPC)               | Etot                | H                   | G                   | ΔE                | Δ(E+ZPC) | ΔH    | ΔG   |
| CO <sub>2</sub>                                       | -188.495463           | -188.492845         | -188.491901         | -188.51616          |                   |          |       |      |
| (CH <sub>3</sub> ) <sub>2</sub> N-EDA                 | -324.128747           | -324.114379         | -324.113134         | -324.175834         |                   |          |       |      |
| [Et <sub>2</sub> NH <sub>2</sub> ][HSO <sub>4</sub> ] | -913.576638           | -913.563678         | -913.562733         | -913.617485         |                   |          |       |      |
| <b>SUM</b>                                            | <b>-1426.200848</b>   | <b>-1426.170902</b> | <b>-1426.167768</b> | <b>-1426.309479</b> |                   |          |       |      |
| <b>I1</b> <sub>Me<sub>2</sub>N-EDA</sub>              | -1426.237417          | -1426.212180        | -1426.211236        | -1426.297204        |                   |          |       |      |
|                                                       | -0.036569             | -0.041278           | -0.043468           | 0.012275            | -22.9             | -25.9    | -27.3 | 7.7  |
| <b>TS1</b> <sub>Me<sub>2</sub>N-EDA</sub>             | -1426.232271          | -1426.207585        | -1426.206641        | -1426.291536        |                   |          |       |      |
|                                                       | -0.031423             | -0.036683           | -0.038873           | 0.017943            | -19.7             | -23.0    | -24.4 | 11.3 |
| <b>I2</b> <sub>Me<sub>2</sub>N-EDA</sub>              | -1426.242576          | -1426.217313        | -1426.216369        | -1426.302177        |                   |          |       |      |
|                                                       | -0.041728             | -0.046411           | -0.048601           | 0.007302            | -26.2             | -29.1    | -30.5 | 4.6  |
| <b>TS2</b> <sub>Me<sub>2</sub>N-EDA</sub>             | -1426.18904           | -1426.165744        | -1426.1648          | -1426.242285        |                   |          |       |      |
|                                                       | 0.011808              | 0.005158            | 0.002968            | 0.067194            | 7.4               | 3.2      | 1.9   | 42.2 |
| <b>P</b> <sub>Me<sub>2</sub>N-EDA</sub>               | -1426.257242          | -1426.231693        | -1426.230749        | -1426.314097        |                   |          |       |      |
|                                                       | -0.056394             | -0.060791           | -0.062981           | -0.004618           | -35.4             | -38.1    | -39.5 | -2.9 |

**Table S7.** Relative energies (kcal/mol) for HO-EDA+CO<sub>2</sub> cyclocondensation in gas phase at 298.15 K.

| Structure                                             | Energies in gas phase |                     |                     |                     | Relative energies |          |       |      |
|-------------------------------------------------------|-----------------------|---------------------|---------------------|---------------------|-------------------|----------|-------|------|
|                                                       | (E+ZPC)               | Etot                | H                   | G                   | ΔE                | Δ(E+ZPC) | ΔH    | ΔG   |
| CO <sub>2</sub>                                       | -188.495463           | -188.492845         | -188.491901         | -188.51616          |                   |          |       |      |
| OH-EDA                                                | -265.489745           | -265.479693         | -265.478448         | -265.530799         |                   |          |       |      |
| [Et <sub>2</sub> NH <sub>2</sub> ][HSO <sub>4</sub> ] | -913.576638           | -913.563678         | -913.562733         | -913.617485         |                   |          |       |      |
| <b>SUM</b>                                            | <b>-1367.561846</b>   | <b>-1367.536216</b> | <b>-1367.533082</b> | <b>-1367.664444</b> |                   |          |       |      |
| <b>I1</b> <sub>HO-EDA</sub>                           | -1367.598295          | -1367.575551        | -1367.574607        | -1367.655242        |                   |          |       |      |
|                                                       | -0.036449             | -0.039335           | -0.041525           | 0.009202            | -22.9             | -24.7    | -26.1 | 5.8  |
| <b>TS1</b> <sub>HO-EDA</sub>                          | -1367.597992          | -1367.575689        | -1367.574745        | -1367.654548        |                   |          |       |      |
|                                                       | -0.036146             | -0.039473           | -0.041663           | 0.009896            | -22.7             | -24.8    | -26.1 | 6.2  |
| <b>I2</b> <sub>HO-EDA</sub>                           | -1367.603767          | -1367.581239        | -1367.580294        | -1367.659896        |                   |          |       |      |
|                                                       | -0.041921             | -0.045023           | -0.047212           | 0.004548            | -26.3             | -28.3    | -29.6 | 2.9  |
| <b>TS2</b> <sub>HO-EDA</sub>                          | -1367.550655          | -1367.529825        | -1367.528881        | -1367.60212         |                   |          |       |      |
|                                                       | 0.011191              | 0.006391            | 0.004201            | 0.062324            | 7.0               | 4.0      | 2.6   | 39.1 |
| <b>P</b> <sub>HO-EDA</sub>                            | -1367.623541          | -1367.601373        | -1367.600428        | -1367.675281        |                   |          |       |      |
|                                                       | -0.061695             | -0.065157           | -0.067346           | -0.010837           | -38.7             | -40.9    | -42.3 | -6.8 |

**Table S8.** Relative energies (kcal/mol) for NO<sub>2</sub>-EDA+CO<sub>2</sub> cyclocondensation in gas phase at 298.15 K.

| Structure                                             | Energies in gas phase |                     |                     |                     | Relative energies |          |       |      |
|-------------------------------------------------------|-----------------------|---------------------|---------------------|---------------------|-------------------|----------|-------|------|
|                                                       | (E+ZPC)               | Etot                | H                   | G                   | ΔE                | Δ(E+ZPC) | ΔH    | ΔG   |
| CO <sub>2</sub>                                       | -188.495463           | -188.492845         | -188.491901         | -188.51616          |                   |          |       |      |
| NO <sub>2</sub> -EDA                                  | -394.729017           | -394.721645         | -394.720701         | -394.761362         |                   |          |       |      |
| [Et <sub>2</sub> NH <sub>2</sub> ][HSO <sub>4</sub> ] | -913.576638           | -913.563678         | -913.562733         | -913.617485         |                   |          |       |      |
| <b>SUM</b>                                            | <b>-1496.801118</b>   | <b>-1496.778168</b> | <b>-1496.775335</b> | <b>-1496.895007</b> |                   |          |       |      |
| <b>I1</b> <sub>NO<sub>2</sub>-EDA</sub>               | -1496.833823          | -1496.809642        | -1496.808698        | -1496.893917        |                   |          |       |      |
|                                                       | -0.032705             | -0.031474           | -0.033363           | 0.001090            | -20.5             | -19.8    | -20.9 | 0.7  |
| <b>TS1</b> <sub>NO<sub>2</sub>-EDA</sub>              | -1496.833368          | -1496.810356        | -1496.809412        | -1496.890966        |                   |          |       |      |
|                                                       | -0.032250             | -0.032188           | -0.034077           | 0.004041            | -20.2             | -20.2    | -21.4 | 2.5  |
| <b>I2</b> <sub>NO<sub>2</sub>-EDA</sub>               | -1496.842234          | -1496.818237        | -1496.817293        | -1496.90164         |                   |          |       |      |
|                                                       | -0.041116             | -0.040069           | -0.041958           | -0.006633           | -25.8             | -25.1    | -26.3 | -4.2 |
| <b>TS2</b> <sub>NO<sub>2</sub>-EDA</sub>              | -1496.783721          | -1496.761545        | -1496.760601        | -1496.837609        |                   |          |       |      |
|                                                       | 0.017397              | 0.016623            | 0.014734            | 0.057398            | 10.9              | 10.4     | 9.2   | 36.0 |
| <b>P</b> <sub>NO<sub>2</sub>-EDA</sub>                | -1496.843551          | -1496.818924        | -1496.81798         | -1496.901931        |                   |          |       |      |
|                                                       | -0.042433             | -0.040756           | -0.042645           | -0.006924           | -26.6             | -25.6    | -26.8 | -4.3 |

**Table S9.** Relative energies (kcal/mol) for ETA+CO<sub>2</sub> cyclocondensation in gas phase at 298.15 K.

| Structure                                             | Energies in gas phase |                     |                     |                     | Relative energies |          |       |       |
|-------------------------------------------------------|-----------------------|---------------------|---------------------|---------------------|-------------------|----------|-------|-------|
|                                                       | (E+ZPC)               | Etot                | H                   | G                   | ΔE                | Δ(E+ZPC) | ΔH    | ΔG    |
| CO <sub>2</sub>                                       | -188.495463           | -188.492845         | -188.491901         | -188.51616          |                   |          |       |       |
| ETA                                                   | -210.168228           | -210.160614         | -210.159369         | -210.206344         |                   |          |       |       |
| water                                                 | -76.350722            | -76.346972          | -76.345727          | -76.375382          |                   |          |       |       |
| [Et <sub>2</sub> NH <sub>2</sub> ][HSO <sub>4</sub> ] | -913.576638           | -913.563678         | -913.562733         | -913.617485         |                   |          |       |       |
| <b>SUM</b>                                            | <b>-1312.240329</b>   | <b>-1312.217137</b> | <b>-1312.214003</b> | <b>-1312.339989</b> |                   |          |       |       |
| <b>I1</b> <sub>ETA</sub>                              | -1312.279811          | -1312.245786        | -1312.244541        | -1312.361439        |                   |          |       |       |
|                                                       | -0.039482             | -0.028649           | -0.030538           | -0.021450           | -24.8             | -18.0    | -19.2 | -13.5 |
| <b>TS1</b> <sub>EYA</sub>                             | -1312.279303          | -1312.246812        | -1312.245567        | -1312.358045        |                   |          |       |       |
|                                                       | -0.038974             | -0.029675           | -0.031564           | -0.018056           | -24.5             | -18.6    | -19.8 | -11.3 |
| <b>I2</b> <sub>ETA</sub>                              | -1312.285932          | -1312.252112        | -1312.250867        | -1312.366293        |                   |          |       |       |
|                                                       | -0.045603             | -0.034975           | -0.036864           | -0.026304           | -28.6             | -21.9    | -23.1 | -16.5 |
| <b>TS2</b> <sub>ETA</sub>                             | -1312.223859          | -1312.191657        | -1312.190412        | -1312.299366        |                   |          |       |       |
|                                                       | 0.016470              | 0.025480            | 0.023591            | 0.040623            | 10.3              | 16.0     | 14.8  | 25.5  |
| <b>P</b> <sub>ETA</sub>                               | -1312.305933          | -1312.271588        | -1312.270343        | -1312.38575         |                   |          |       |       |
|                                                       | -0.065604             | -0.054451           | -0.056340           | -0.045761           | -41.2             | -34.2    | -35.4 | -28.7 |

**Table S10.** Relative energies (kcal/mol) for EG+CO<sub>2</sub> cyclocondensation in gas phase at 298.15 K.

| Structure               | Energies in gas phase |                     |                     |                     | Relative energies |                 |            |            |
|-------------------------|-----------------------|---------------------|---------------------|---------------------|-------------------|-----------------|------------|------------|
|                         | (E+ZPC)               | Etot                | H                   | G                   | $\Delta E$        | $\Delta(E+ZPC)$ | $\Delta H$ | $\Delta G$ |
| CO2                     | -188.495463           | -188.492845         | -188.491901         | -188.51616          |                   |                 |            |            |
| EG                      | -230.043156           | -230.035057         | -230.033812         | -230.081803         |                   |                 |            |            |
| water                   | -76.350722            | -76.346972          | -76.345727          | -76.375382          |                   |                 |            |            |
| [Et2NH2][HSO4]          | -913.576638           | -913.563678         | -913.562733         | -913.617485         |                   |                 |            |            |
| <b>SUM</b>              | <b>-1332.115257</b>   | <b>-1332.091580</b> | <b>-1332.088446</b> | <b>-1332.215448</b> |                   |                 |            |            |
| <b>I1<sub>EG</sub></b>  | -1332.157933          | -1332.122131        | -1332.120886        | -1332.242955        |                   |                 |            |            |
|                         | -0.042676             | -0.030551           | -0.032440           | -0.027507           | -26.8             | -19.2           | -20.4      | -17.3      |
| <b>TS1<sub>EG</sub></b> | -1332.141007          | -1332.108263        | -1332.107018        | -1332.220894        |                   |                 |            |            |
|                         | -0.025750             | -0.016683           | -0.018572           | -0.005446           | -16.2             | -10.5           | -11.7      | -3.4       |
| <b>I2<sub>EG</sub></b>  | -1332.165151          | -1332.131975        | -1332.13073         | -1332.24207         |                   |                 |            |            |
|                         | -0.049894             | -0.040395           | -0.042284           | -0.026622           | -31.3             | -25.3           | -26.5      | -16.7      |
| <b>TS2<sub>EG</sub></b> | -1332.104095          | -1332.072983        | -1332.071738        | -1332.177164        |                   |                 |            |            |
|                         | 0.011162              | 0.018597            | 0.016708            | 0.038284            | 7.0               | 11.7            | 10.5       | 24.0       |
| <b>P<sub>EG</sub></b>   | -1332.165233          | -1332.131705        | -1332.13046         | -1332.24417         |                   |                 |            |            |
|                         | -0.049976             | -0.040125           | -0.042014           | -0.028722           | -31.4             | -25.2           | -26.4      | -18.0      |

**Table S11.** Relative energies (kcal/mol) for ME+CO<sub>2</sub> cyclocondensation in gas phase at 298.15 K.

| Structure               | Energies in gas phase |                     |                     |                     | Relative energies |                 |            |            |
|-------------------------|-----------------------|---------------------|---------------------|---------------------|-------------------|-----------------|------------|------------|
|                         | (E+ZPC)               | Etot                | H                   | G                   | $\Delta E$        | $\Delta(E+ZPC)$ | $\Delta H$ | $\Delta G$ |
| CO2                     | -188.495463           | -188.492845         | -188.491901         | -188.51616          |                   |                 |            |            |
| ME                      | -553.01644            | -553.008464         | -553.007219         | -553.056196         |                   |                 |            |            |
| Water                   | -76.350722            | -76.346972          | -76.345727          | -76.375382          |                   |                 |            |            |
| [Et2NH2][HSO4]          | -913.576638           | -913.563678         | -913.562733         | -913.617485         |                   |                 |            |            |
| <b>SUM</b>              | <b>-1655.088541</b>   | <b>-1655.064987</b> | <b>-1655.061853</b> | <b>-1655.189841</b> |                   |                 |            |            |
| <b>I1<sub>ME</sub></b>  | -1655.128938          | -1655.093715        | -1655.092470        | -1655.210658        |                   |                 |            |            |
|                         | -0.040397             | -0.028728           | -0.030617           | -0.020817           | -25.3             | -18.0           | -19.2      | -13.1      |
| <b>TS1<sub>ME</sub></b> | -1655.109460          | -1655.075853        | -1655.074608        | -1655.191240        |                   |                 |            |            |
|                         | -0.020919             | -0.010866           | -0.012755           | -0.001399           | -13.1             | -6.8            | -8.0       | -0.9       |
| <b>I2<sub>ME</sub></b>  | -1655.13364           | -1655.099268        | -1655.098022        | -1655.214769        |                   |                 |            |            |
|                         | -0.045099             | -0.034281           | -0.036169           | -0.024928           | -28.3             | -21.5           | -22.7      | -15.6      |
| <b>TS2<sub>ME</sub></b> | -1655.066276          | -1655.033801        | -1655.032556        | -1655.14256         |                   |                 |            |            |
|                         | 0.022265              | 0.031186            | 0.029297            | 0.047281            | 14.0              | 19.6            | 18.4       | 29.7       |
| <b>P<sub>ME</sub></b>   | -1655.121107          | -1655.086451        | -1655.085206        | -1655.201979        |                   |                 |            |            |
|                         | -0.032566             | -0.021464           | -0.023353           | -0.012138           | -20.4             | -13.5           | -14.7      | -7.6       |



**Table S12.** Relative energies (kcal/mol) for EDT+CO<sub>2</sub> cyclocondensation in gas phase at 298.15 K.

| Structure                                             | Energies in gas phase |                     |                     |                     | Relative energies |          |       |       |
|-------------------------------------------------------|-----------------------|---------------------|---------------------|---------------------|-------------------|----------|-------|-------|
|                                                       | (E+ZPC)               | Etot                | H                   | G                   | ΔE                | Δ(E+ZPC) | ΔH    | ΔG    |
| CO <sub>2</sub>                                       | -188.495463           | -188.492845         | -188.491901         | -188.51616          |                   |          |       |       |
| EDT                                                   | -875.988779           | -875.980021         | -875.978776         | -876.030832         |                   |          |       |       |
| water                                                 | -76.350722            | -76.346972          | -76.345727          | -76.375382          |                   |          |       |       |
| [Et <sub>2</sub> NH <sub>2</sub> ][HSO <sub>4</sub> ] | -913.576638           | -913.563678         | -913.562733         | -913.617485         |                   |          |       |       |
| <b>SUM</b>                                            | <b>-1978.060880</b>   | <b>-1978.036544</b> | <b>-1978.033410</b> | <b>-1978.164477</b> |                   |          |       |       |
|                                                       |                       |                     |                     |                     |                   |          |       |       |
|                                                       | -1978.100559          | -1978.063072        | -1978.061827        | -1978.184853        |                   |          |       |       |
| <b>I1<sub>EDT</sub></b>                               | -0.039679             | -0.026528           | -0.028417           | -0.020376           | -24.9             | -16.6    | -17.8 | -12.8 |
|                                                       |                       |                     |                     |                     |                   |          |       |       |
|                                                       | -1978.064791          | -1978.029491        | -1978.028246        | -1978.149388        |                   |          |       |       |
| <b>TS1<sub>EDT</sub></b>                              | -0.003911             | 0.007053            | 0.005164            | 0.015089            | -2.5              | 4.4      | 3.2   | 9.5   |
|                                                       |                       |                     |                     |                     |                   |          |       |       |
| <b>I2<sub>EDT</sub></b>                               | -1978.086552          | -1978.050839        | -1978.049594        | -1978.171001        |                   |          |       |       |
|                                                       | -0.025672             | -0.014295           | -0.016184           | -0.006524           | -16.1             | -9.0     | -10.2 | -4.1  |
|                                                       |                       |                     |                     |                     |                   |          |       |       |
| <b>TS2<sub>EDT</sub></b>                              | -1978.023896          | -1977.990061        | -1977.988816        | -1978.102145        |                   |          |       |       |
|                                                       | 0.036984              | 0.046483            | 0.044594            | 0.062332            | 23.2              | 29.2     | 28.0  | 39.1  |
|                                                       |                       |                     |                     |                     |                   |          |       |       |
| <b>P<sub>EDT</sub></b>                                | -1978.082951          | -1978.047448        | -1978.046203        | -1978.163666        |                   |          |       |       |
|                                                       | -0.022071             | -0.010904           | -0.012793           | 0.000811            | -13.8             | -6.8     | -8.0  | 0.5   |

**Table S13.** Relative energies (kcal/mol) for intermediates and TSs of [Et<sub>2</sub>NH<sub>2</sub>][HSeO<sub>4</sub>] catalyzed EDA+CO<sub>2</sub> cyclocondensation reaction.

| Structure                                              | Energies in gas phase |                     |                     |                     | Relative energies |          |       |       |
|--------------------------------------------------------|-----------------------|---------------------|---------------------|---------------------|-------------------|----------|-------|-------|
|                                                        | (E+ZPC)               | Etot                | H                   | G                   | ΔE                | Δ(E+ZPC) | ΔH    | ΔG    |
| CO <sub>2</sub>                                        | -188.495463           | -188.492845         | -188.491901         | -188.516159         |                   |          |       |       |
| EDA                                                    | -190.295679           | -190.290188         | -190.289243         | -190.323354         |                   |          |       |       |
| [Et <sub>2</sub> NH <sub>2</sub> ][HSeO <sub>4</sub> ] | -2914.322913          | -2914.309427        | -2914.308482        | -2914.364299        |                   |          |       |       |
| <b>SUM</b>                                             | <b>-3293.114055</b>   | <b>-3293.092460</b> | <b>-3293.089626</b> | <b>-3293.203812</b> |                   |          |       |       |
|                                                        |                       |                     |                     |                     |                   |          |       |       |
|                                                        | -3293.156281          | -3293.134309        | -3293.133365        | -3293.210686        |                   |          |       |       |
| <b>I1<sub>EDA</sub></b>                                | -0.042226             | -0.041849           | -0.043739           | -0.006874           | -26.5             | -26.3    | -27.4 | -4.3  |
|                                                        |                       |                     |                     |                     |                   |          |       |       |
|                                                        | -3293.156365          | -3293.135383        | -3293.134439        | -3293.209394        |                   |          |       |       |
| <b>TS1<sub>EDA</sub></b>                               | -0.042310             | -0.042923           | -0.044813           | -0.005582           | -26.5             | -26.9    | -28.1 | -3.5  |
|                                                        |                       |                     |                     |                     |                   |          |       |       |
|                                                        | -3293.162055          | -3293.140021        | -3293.139077        | -3293.217375        |                   |          |       |       |
| <b>I2<sub>EDA</sub></b>                                | -0.048000             | -0.047561           | -0.049451           | -0.013563           | -30.1             | -29.8    | -31.0 | -8.5  |
|                                                        |                       |                     |                     |                     |                   |          |       |       |
|                                                        | -3293.11271           | -3293.092512        | -3293.091567        | -3293.162663        |                   |          |       |       |
| <b>TS2<sub>EDA</sub></b>                               | 0.001345              | -0.000052           | -0.001941           | 0.041149            | 0.8               | 0.0      | -1.2  | 25.8  |
|                                                        |                       |                     |                     |                     |                   |          |       |       |
|                                                        | -3293.174182          | -3293.152207        | -3293.151263        | -3293.227255        |                   |          |       |       |
| <b>P<sub>EDA</sub></b>                                 | -0.060127             | -0.059747           | -0.061637           | -0.023443           | -37.7             | -37.5    | -38.7 | -14.7 |

**Table S14.** Relative energies (kcal/mol) for intermediates and TSs of [Et<sub>2</sub>NH<sub>2</sub>][H<sub>2</sub>PO<sub>4</sub>] catalyzed EDA+CO<sub>2</sub> cyclocondensation reaction.

| Structure                                                           | Energies in gas phase |                     |                     |                     | Relative energies |          |        |        |
|---------------------------------------------------------------------|-----------------------|---------------------|---------------------|---------------------|-------------------|----------|--------|--------|
|                                                                     | (E+ZPC)               | Etot                | H                   | G                   | ΔE                | Δ(E+ZPC) | ΔH     | ΔG     |
| CO <sub>2</sub>                                                     | -188.495463           | -188.492845         | -188.491901         | -188.516159         |                   |          |        |        |
| EDA                                                                 | -190.295679           | -190.290188         | -190.289243         | -190.323354         |                   |          |        |        |
| [Et <sub>2</sub> NH <sub>2</sub> ][H <sub>2</sub> PO <sub>4</sub> ] | -857.481182           | -857.467426         | -857.466481         | -857.523252         |                   |          |        |        |
| <b>SUM</b>                                                          | <b>-1236.272324</b>   | <b>-1236.250459</b> | <b>-1236.247625</b> | <b>-1236.362765</b> |                   |          |        |        |
|                                                                     |                       |                     |                     |                     |                   |          |        |        |
|                                                                     | -1236.332742          | -1236.310925        | -1236.309981        | -1236.384639        |                   |          |        |        |
| <b>I1<sub>EDA</sub></b>                                             | -0.060418             | -0.060466           | -0.062356           | -0.021874           | -37.91            | -37.94   | -39.13 | -13.73 |
|                                                                     |                       |                     |                     |                     |                   |          |        |        |
|                                                                     | -1236.316013          | -1236.294796        | -1236.293852        | -1236.368215        |                   |          |        |        |
| <b>TS1<sub>EDA</sub></b>                                            | -0.043689             | -0.044337           | -0.046227           | -0.005450           | -27.42            | -27.82   | -29.01 | -3.42  |
|                                                                     |                       |                     |                     |                     |                   |          |        |        |
|                                                                     | -1236.322392          | -1236.300287        | -1236.299343        | -1236.376003        |                   |          |        |        |
| <b>I2<sub>EDA</sub></b>                                             | -0.050068             | -0.049828           | -0.051718           | -0.013238           | -31.42            | -31.27   | -32.45 | -8.31  |
|                                                                     |                       |                     |                     |                     |                   |          |        |        |
|                                                                     | -1236.265727          | -1236.245039        | -1236.244095        | -1236.317347        |                   |          |        |        |
| <b>TS2<sub>EDA</sub></b>                                            | 0.006597              | 0.005420            | 0.003530            | 0.045418            | 4.14              | 3.40     | 2.22   | 28.50  |
|                                                                     |                       |                     |                     |                     |                   |          |        |        |
|                                                                     | -1236.33405           | -1236.312332        | -1236.311388        | -1236.386556        |                   |          |        |        |
| <b>P<sub>EDA</sub></b>                                              | -0.061726             | -0.061873           | -0.063763           | -0.023791           | -38.73            | -38.83   | -40.01 | -14.93 |

**Table S15.** Relative energies (kcal/mol) for intermediates and TSs of [Et<sub>2</sub>NH<sub>2</sub>][H<sub>2</sub>AsO<sub>4</sub>] catalyzed EDA+CO<sub>2</sub> cyclocondensation reaction.

| Structure                                                            | Energies in gas phase |                     |                     |                     | Relative energies |          |        |        |
|----------------------------------------------------------------------|-----------------------|---------------------|---------------------|---------------------|-------------------|----------|--------|--------|
|                                                                      | (E+ZPC)               | Etot                | H                   | G                   | ΔE                | Δ(E+ZPC) | ΔH     | ΔG     |
| CO <sub>2</sub>                                                      | -188.495463           | -188.492845         | -188.491901         | -188.516159         |                   |          |        |        |
| EDA                                                                  | -190.295679           | -190.290188         | -190.289243         | -190.323354         |                   |          |        |        |
| water                                                                | -76.350722            | -76.347887          | -76.346943          | -76.368377          |                   |          |        |        |
| [Et <sub>2</sub> NH <sub>2</sub> ][H <sub>2</sub> AsO <sub>4</sub> ] | -2749.512517          | -2749.497929        | -2749.496985        | -2749.555589        |                   |          |        |        |
| <b>SUM</b>                                                           | <b>-3128.303659</b>   | <b>-3128.280962</b> | <b>-3128.278129</b> | <b>-3128.395102</b> |                   |          |        |        |
|                                                                      |                       |                     |                     |                     |                   |          |        |        |
|                                                                      | -3128.368154          | -3128.345498        | -3128.344554        | -3128.421683        |                   |          |        |        |
| <b>I1<sub>EDA</sub></b>                                              | -0.064495             | -0.064536           | -0.066425           | -0.026581           | -40.47            | -40.50   | -41.68 | -16.68 |
|                                                                      |                       |                     |                     |                     |                   |          |        |        |
|                                                                      | -3128.350709          | -3128.328756        | -3128.327812        | -3128.403917        |                   |          |        |        |
| <b>TS1<sub>EDA</sub></b>                                             | -0.047050             | -0.047794           | -0.049683           | -0.008815           | -29.52            | -29.99   | -31.18 | -5.53  |
|                                                                      |                       |                     |                     |                     |                   |          |        |        |
|                                                                      | -3128.350375          | -3128.327347        | -3128.326403        | -3128.40673         |                   |          |        |        |
| <b>I2<sub>EDA</sub></b>                                              | -0.046716             | -0.046385           | -0.048274           | -0.011628           | -29.31            | -29.11   | -30.29 | -7.30  |
|                                                                      |                       |                     |                     |                     |                   |          |        |        |
|                                                                      | -3128.299719          | -3128.278456        | -3128.277512        | -3128.350766        |                   |          |        |        |
| <b>TS2<sub>EDA</sub></b>                                             | 0.003940              | 0.002506            | 0.000617            | 0.044336            | 2.47              | 1.57     | 0.39   | 27.82  |
|                                                                      |                       |                     |                     |                     |                   |          |        |        |
|                                                                      | -3128.368329          | -3128.345948        | -3128.345004        | -3128.421248        |                   |          |        |        |
| <b>P<sub>EDA</sub></b>                                               | -0.064670             | -0.064986           | -0.066875           | -0.026146           | -40.58            | -40.78   | -41.96 | -16.41 |

**Table S16.** Natural charges of the crucial atoms involved in TS1EDA and the original location in substrate.

| Natural charges of the crucial atoms in substrates | Natural charges of the same atoms in TS1 <sub>EDA</sub> |
|----------------------------------------------------|---------------------------------------------------------|
| <b>CO<sub>2</sub></b>                              | 1C +1.09                                                |
|                                                    | 1O -0.54                                                |
| <b>EDA</b>                                         | 1N -0.93                                                |
|                                                    | 2H +0.38                                                |
| <b>HSO<sub>4</sub><sup>-</sup></b>                 | 2O -0.98                                                |
|                                                    | 3O -0.97                                                |
|                                                    | 1H +0.52                                                |

| <b>I1<sub>EDA</sub></b> |           |           |           |
|-------------------------|-----------|-----------|-----------|
| Symbol                  | X         | Y         | Z         |
| C                       | 2.878922  | 0.684437  | -1.317984 |
| O                       | 1.857318  | 1.376439  | -1.342611 |
| N                       | -3.814288 | 0.211977  | 0.110809  |
| H                       | -3.11387  | 0.185497  | -0.673478 |
| H                       | -3.177996 | -0.142377 | 0.867159  |
| C                       | -4.208986 | 1.614193  | 0.394611  |
| H                       | -4.850229 | 1.602878  | 1.280781  |
| H                       | -4.802014 | 1.967513  | -0.453855 |
| C                       | -4.902335 | -0.763009 | -0.142235 |
| H                       | -5.482233 | -0.396751 | -0.994187 |
| H                       | -5.552094 | -0.769794 | 0.737676  |
| C                       | -4.294031 | -2.131194 | -0.413231 |
| H                       | -3.631839 | -2.093083 | -1.282467 |
| H                       | -3.700703 | -2.465481 | 0.442245  |
| H                       | -5.08436  | -2.860769 | -0.601984 |
| C                       | -2.957289 | 2.453839  | 0.605007  |
| H                       | -2.326122 | 2.442264  | -0.287783 |
| H                       | -3.235771 | 3.4864    | 0.826604  |
| H                       | -2.358249 | 2.062466  | 1.432013  |
| S                       | -0.703042 | -0.462358 | 0.084154  |
| O                       | -1.572156 | -0.686595 | 1.262536  |
| O                       | -1.497265 | -0.186742 | -1.140856 |
| O                       | 0.318589  | -1.501455 | -0.114184 |
| H                       | 0.70124   | 1.138467  | -0.311589 |
| O                       | 0.065916  | 0.888216  | 0.445199  |
| N                       | 2.826816  | -0.320205 | -0.044015 |
| H                       | 1.946185  | -0.872651 | -0.117019 |
| H                       | 2.743854  | 0.260429  | 0.803829  |
| O                       | 3.887903  | 0.562877  | -1.969694 |
| C                       | 4.019771  | -1.16994  | 0.119877  |
| H                       | 3.751948  | -2.01291  | 0.765072  |
| H                       | 4.310847  | -1.53623  | -0.864619 |
| C                       | 5.130634  | -0.330267 | 0.741689  |
| H                       | 6.015244  | -0.962036 | 0.899288  |
| H                       | 5.397694  | 0.450784  | 0.025783  |
| N                       | 4.615574  | 0.30477   | 1.955645  |
| H                       | 4.638604  | -0.341479 | 2.740479  |
| H                       | 5.179282  | 1.108534  | 2.212988  |

| <b>TS1<sub>EDA</sub></b> |           |           |           |
|--------------------------|-----------|-----------|-----------|
| Symbol                   | X         | Y         | Z         |
| C                        | 2.89639   | 0.714695  | -1.213296 |
| O                        | 1.900548  | 1.505356  | -1.331888 |
| N                        | -3.738855 | 0.152686  | 0.187286  |
| H                        | -3.057384 | 0.177521  | -0.625244 |
| H                        | -3.058501 | -0.220927 | 0.895873  |
| C                        | -4.148507 | 1.530298  | 0.549963  |
| H                        | -4.764485 | 1.467994  | 1.452265  |
| H                        | -4.771415 | 1.91385   | -0.263611 |
| C                        | -4.813686 | -0.831875 | -0.070902 |
| H                        | -5.435387 | -0.439154 | -0.880897 |
| H                        | -5.429712 | -0.899971 | 0.830823  |
| C                        | -4.185704 | -2.169426 | -0.435334 |
| H                        | -3.557356 | -2.068117 | -1.324305 |
| H                        | -3.55064  | -2.530475 | 0.378262  |
| H                        | -4.96486  | -2.908986 | -0.632122 |
| C                        | -2.905731 | 2.383081  | 0.764612  |
| H                        | -2.293402 | 2.41357   | -0.1407   |
| H                        | -3.1958   | 3.401619  | 1.032297  |
| H                        | -2.2813   | 1.969464  | 1.5613    |
| S                        | -0.622156 | -0.338688 | -0.059369 |
| O                        | -1.41085  | -0.697451 | 1.150868  |
| O                        | -1.525181 | -0.068375 | -1.218669 |
| O                        | 0.375853  | -1.40399  | -0.405048 |
| H                        | 1.042077  | 1.275564  | -0.642059 |
| O                        | 0.172621  | 0.935119  | 0.260916  |
| N                        | 2.685628  | -0.300521 | -0.100539 |
| H                        | 1.739371  | -0.837739 | -0.276447 |
| H                        | 2.534261  | 0.216074  | 0.78328   |
| O                        | 3.929046  | 0.665446  | -1.826288 |
| C                        | 3.823279  | -1.216005 | 0.11821   |
| H                        | 3.431825  | -2.080657 | 0.662486  |
| H                        | 4.200104  | -1.534771 | -0.853061 |
| C                        | 4.895184  | -0.490158 | 0.926105  |
| H                        | 5.712263  | -1.189122 | 1.149631  |
| H                        | 5.301524  | 0.313152  | 0.306417  |
| N                        | 4.263896  | 0.104115  | 2.104059  |
| H                        | 4.147318  | -0.584834 | 2.842813  |
| H                        | 4.827658  | 0.858498  | 2.481976  |

| <b>I2<sub>EDA</sub></b> |           |           |           |
|-------------------------|-----------|-----------|-----------|
| Symbol                  | X         | Y         | Z         |
| C                       | 2.860022  | -0.629586 | 1.283808  |
| O                       | 2.069115  | -1.696597 | 1.282621  |
| N                       | -3.768135 | 0.2524    | 0.084805  |
| H                       | -2.99287  | -0.095831 | 0.704827  |
| H                       | -3.220422 | 0.298801  | -0.80577  |
| C                       | -4.83876  | -0.768795 | -0.020864 |
| H                       | -5.573795 | -0.404559 | -0.744237 |
| H                       | -5.32406  | -0.838903 | 0.956615  |
| C                       | -4.170069 | 1.620333  | 0.500674  |
| H                       | -4.661583 | 1.535499  | 1.473966  |

| <b>TS2<sub>EDA</sub></b> |           |           |           |
|--------------------------|-----------|-----------|-----------|
| Symbol                   | X         | Y         | Z         |
| C                        | 3.29309   | -0.288715 | 0.371172  |
| O                        | 2.718373  | -1.374308 | -0.934302 |
| N                        | -3.163267 | -0.041078 | 0.439469  |
| H                        | -2.838729 | -0.249988 | -0.551801 |
| H                        | -2.219548 | 0.251629  | 0.801383  |
| C                        | -4.100601 | 1.103904  | 0.442181  |
| H                        | -4.325055 | 1.353385  | 1.483805  |
| H                        | -5.027461 | 0.774895  | -0.036941 |
| C                        | -3.609867 | -1.287157 | 1.105008  |
| H                        | -4.53746  | -1.605529 | 0.61991   |

|   |           |           |           |   |           |           |           |
|---|-----------|-----------|-----------|---|-----------|-----------|-----------|
| H | -4.903985 | 1.982809  | -0.224825 | H | -3.835589 | -1.047082 | 2.148669  |
| C | -2.936508 | 2.509999  | 0.560365  | C | -2.517096 | -2.340081 | 0.984567  |
| H | -2.209134 | 2.120348  | 1.277898  | H | -2.288353 | -2.547845 | -0.064235 |
| H | -2.441977 | 2.558487  | -0.413878 | H | -1.590621 | -1.995051 | 1.451604  |
| H | -3.222694 | 3.520046  | 0.861481  | H | -2.836287 | -3.264644 | 1.470896  |
| C | -4.224508 | -2.093696 | -0.447806 | C | -3.464074 | 2.270344  | -0.299837 |
| H | -3.478537 | -2.425176 | 0.279689  | H | -3.227741 | 1.986117  | -1.328712 |
| H | -5.001276 | -2.856867 | -0.528818 | H | -4.144219 | 3.124771  | -0.311824 |
| H | -3.726265 | -1.994759 | -1.416227 | H | -2.528677 | 2.566414  | 0.182611  |
| S | -0.650601 | -0.228211 | -0.433985 | S | -0.336822 | -0.156932 | -0.986325 |
| O | -1.61271  | 0.087496  | -1.509701 | O | 0.610641  | 0.668041  | -1.779536 |
| O | -1.340127 | -0.542942 | 0.843524  | O | -1.650455 | -0.319911 | -1.67746  |
| O | 0.138217  | 1.142197  | -0.194218 | O | -0.554076 | 0.46883   | 0.376999  |
| H | 1.420152  | -1.672011 | 0.537954  | H | 1.652457  | -1.520158 | -0.933922 |
| O | 0.364673  | -1.232682 | -0.794872 | O | 0.276588  | -1.531948 | -0.746103 |
| N | 2.69009   | 0.221607  | 0.161648  | N | 2.275169  | -0.402558 | 1.364188  |
| H | 1.080264  | 0.911701  | 0.076539  | H | 3.169685  | -2.21006  | -0.733717 |
| H | 2.565145  | -0.315098 | -0.701323 | H | 1.391187  | -0.71653  | 0.960307  |
| O | 3.634686  | -0.384973 | 2.174388  | O | 4.474243  | -0.44669  | 0.529844  |
| C | 3.741167  | 1.223782  | -0.016762 | C | 2.114514  | 0.96058   | 1.863813  |
| H | 3.350802  | 1.996556  | -0.689092 | H | 1.143469  | 1.058897  | 2.346847  |
| H | 3.946842  | 1.675931  | 0.953974  | H | 2.910257  | 1.174438  | 2.582144  |
| C | 5.003363  | 0.598711  | -0.603299 | C | 2.216162  | 1.906814  | 0.632089  |
| H | 5.783836  | 1.368591  | -0.700504 | H | 1.224507  | 2.159737  | 0.256977  |
| H | 5.367395  | -0.152372 | 0.104199  | H | 2.800802  | 2.805427  | 0.829144  |
| N | 4.657217  | -0.072116 | -1.856509 | N | 2.884616  | 1.07369   | -0.403378 |
| H | 4.574326  | 0.606774  | -2.609597 | H | 2.183167  | 0.866352  | -1.156532 |
| H | 5.384177  | -0.726314 | -2.129364 | H | 3.742442  | 1.469104  | -0.786876 |

| <b>P<sub>EDA</sub></b> |           |           |           | <b>I<sub>HO-EDA</sub></b> |           |           |           |
|------------------------|-----------|-----------|-----------|---------------------------|-----------|-----------|-----------|
| Symbol                 | X         | Y         | Z         | Symbol                    | X         | Y         | Z         |
| C                      | -3.554939 | 0.871944  | -0.391139 | C                         | -2.449925 | 0.993133  | 1.303022  |
| O                      | -2.743246 | -0.516686 | 2.07151   | O                         | -1.40947  | 1.645441  | 1.204618  |
| N                      | 3.439633  | 0.342481  | -0.243114 | N                         | 4.163454  | 0.098089  | -0.136954 |
| H                      | 3.014059  | 0.101366  | 0.685775  | H                         | 3.453108  | 0.178074  | 0.633088  |
| H                      | 2.596345  | 0.137573  | -0.834204 | H                         | 3.526647  | -0.297948 | -0.868761 |
| C                      | 3.754714  | 1.792575  | -0.29073  | C                         | 4.623738  | 1.450082  | -0.543525 |
| H                      | 4.107088  | 2.020351  | -1.300845 | H                         | 5.280155  | 1.327215  | -1.40976  |
| H                      | 4.576033  | 1.973696  | 0.408396  | H                         | 5.215255  | 1.857005  | 0.281525  |
| C                      | 4.535794  | -0.602848 | -0.567277 | C                         | 5.205382  | -0.892881 | 0.227866  |
| H                      | 5.355078  | -0.410276 | 0.131103  | H                         | 5.78622   | -0.470545 | 1.052667  |
| H                      | 4.8843    | -0.370862 | -1.577689 | H                         | 5.867631  | -1.008481 | -0.634866 |
| C                      | 4.015318  | -2.028274 | -0.456275 | C                         | 4.538014  | -2.204401 | 0.6148    |
| H                      | 3.656046  | -2.230553 | 0.556482  | H                         | 3.863518  | -2.05922  | 1.46309   |
| H                      | 3.181017  | -2.189193 | -1.144533 | H                         | 3.947732  | -2.598636 | -0.216943 |
| H                      | 4.81136   | -2.736437 | -0.69537  | H                         | 5.295972  | -2.941191 | 0.889086  |
| C                      | 2.509458  | 2.58786   | 0.073957  | C                         | 3.413992  | 2.31709   | -0.860568 |
| H                      | 2.158193  | 2.327334  | 1.076136  | H                         | 2.764403  | 2.414008  | 0.013695  |
| H                      | 2.728711  | 3.657221  | 0.042364  | H                         | 3.741521  | 3.312598  | -1.167923 |
| H                      | 1.694396  | 2.373301  | -0.622673 | H                         | 2.817306  | 1.877053  | -1.664537 |
| S                      | 0.463267  | -0.500859 | 0.558502  | S                         | 1.015175  | -0.433788 | -0.087747 |
| O                      | -0.375939 | 0.836553  | 0.840873  | O                         | 1.881948  | -0.806972 | -1.227943 |
| O                      | 1.585316  | -0.409119 | 1.518501  | O                         | 1.80675   | -0.057691 | 1.111964  |

|   |           |           |           |   |           |           |           |
|---|-----------|-----------|-----------|---|-----------|-----------|-----------|
| O | 0.932013  | -0.384236 | -0.85373  | O | -0.042049 | -1.413789 | 0.206393  |
| H | -1.940727 | -1.027806 | 1.865822  | H | -0.303883 | 1.259277  | 0.149011  |
| O | -0.443376 | -1.629459 | 0.766526  | O | 0.292086  | 0.898255  | -0.59162  |
| N | -4.191997 | -0.344348 | -0.43117  | N | -2.501773 | -0.13434  | 0.122217  |
| H | -2.407493 | 0.369382  | 2.265699  | H | -1.637089 | -0.711111 | 0.20665   |
| H | -4.70639  | -0.54064  | 0.419794  | H | -2.441325 | 0.357565  | -0.779593 |
| O | -3.918646 | 1.895358  | 0.138358  | O | -3.425593 | 0.962006  | 2.012814  |
| C | -3.276885 | -1.3753   | -0.910143 | C | -3.725343 | -0.951371 | 0.117428  |
| H | -2.724876 | -1.832137 | -0.084011 | H | -3.560607 | -1.85219  | -0.482383 |
| H | -3.804564 | -2.143708 | -1.478747 | H | -3.946765 | -1.227517 | 1.148995  |
| C | -2.325664 | -0.558957 | -1.79548  | C | -4.87026  | -0.1409   | -0.486975 |
| H | -1.320956 | -0.982659 | -1.834577 | H | -5.022535 | 0.759881  | 0.118429  |
| H | -2.729249 | -0.451149 | -2.80903  | N | -4.482729 | 0.265989  | -1.811252 |
| N | -2.324977 | 0.732764  | -1.094653 | H | -4.514019 | -0.546042 | -2.427314 |
| H | -1.140589 | 0.834472  | 0.183902  | H | -5.145947 | 0.94251   | -2.17921  |
| H | -2.094405 | 1.556887  | -1.64105  | O | -6.043882 | -0.929834 | -0.533843 |
|   |           |           |           | H | -6.374672 | -1.043702 | 0.369577  |

**TS1**<sub>HO-EDA</sub>

| Symbol | X         | Y         | Z         |
|--------|-----------|-----------|-----------|
| C      | -2.465091 | 1.007022  | 1.283303  |
| O      | -1.413158 | 1.644754  | 1.198297  |
| N      | 4.164712  | 0.097425  | -0.137777 |
| H      | 3.455701  | 0.179966  | 0.633545  |
| H      | 3.525163  | -0.300387 | -0.866684 |
| C      | 4.624498  | 1.447898  | -0.549332 |
| H      | 5.27899   | 1.322396  | -1.416675 |
| H      | 5.217953  | 1.857249  | 0.273149  |
| C      | 5.206664  | -0.893186 | 0.227306  |
| H      | 5.789815  | -0.469203 | 1.049653  |
| H      | 5.866892  | -1.011781 | -0.636595 |
| C      | 4.539021  | -2.203104 | 0.619291  |
| H      | 3.866578  | -2.054997 | 1.468705  |
| H      | 3.946301  | -2.59882  | -0.210011 |
| H      | 5.296869  | -2.939958 | 0.893732  |
| C      | 3.4142    | 2.314234  | -0.866338 |
| H      | 2.766404  | 2.413695  | 0.008962  |
| H      | 3.741197  | 3.308772  | -1.177413 |
| H      | 2.81571   | 1.871709  | -1.667595 |
| S      | 1.017367  | -0.433214 | -0.081247 |
| O      | 1.88282   | -0.80826  | -1.222413 |
| O      | 1.811939  | -0.051754 | 1.115178  |
| O      | -0.035826 | -1.415478 | 0.218846  |
| H      | -0.310973 | 1.254149  | 0.15234   |
| O      | 0.290154  | 0.894746  | -0.587198 |
| N      | -2.502161 | -0.143063 | 0.133041  |
| H      | -1.635695 | -0.714303 | 0.230969  |
| H      | -2.441025 | 0.337595  | -0.774799 |
| O      | -3.459127 | 1.012064  | 1.968788  |
| C      | -3.722649 | -0.966749 | 0.131164  |
| H      | -3.549556 | -1.867914 | -0.466107 |
| H      | -3.95355  | -1.243406 | 1.159021  |
| C      | -4.875177 | -0.170866 | -0.472636 |

**I2**<sub>HO-EDA</sub>

| Symbol | X         | Y         | Z         |
|--------|-----------|-----------|-----------|
| C      | 2.42273   | -0.942902 | 1.282779  |
| O      | 1.567576  | -1.951259 | 1.154041  |
| N      | -4.059983 | 0.336848  | 0.106078  |
| H      | -3.27012  | -0.070103 | 0.669643  |
| H      | -3.547608 | 0.446413  | -0.796661 |
| C      | -5.151692 | -0.658212 | -0.037036 |
| H      | -5.908354 | -0.226475 | -0.698194 |
| H      | -5.597963 | -0.798289 | 0.95136   |
| C      | -4.424425 | 1.672987  | 0.644044  |
| H      | -4.876278 | 1.516046  | 1.627428  |
| H      | -5.18218  | 2.099682  | -0.019233 |
| C      | -3.17675  | 2.540965  | 0.72192   |
| H      | -2.425736 | 2.086143  | 1.3738    |
| H      | -2.724276 | 2.665024  | -0.266002 |
| H      | -3.435077 | 3.525981  | 1.116504  |
| C      | -4.579852 | -1.954501 | -0.591459 |
| H      | -3.809356 | -2.353034 | 0.07428   |
| H      | -5.373384 | -2.697394 | -0.695468 |
| H      | -4.12343  | -1.789608 | -1.571472 |
| S      | -0.959966 | -0.189057 | -0.519072 |
| O      | -1.927899 | 0.243239  | -1.545013 |
| O      | -1.631284 | -0.565262 | 0.752849  |
| O      | -0.107427 | 1.1278    | -0.204943 |
| H      | 0.959673  | -1.823364 | 0.386698  |
| O      | 0.002619  | -1.210707 | -0.968218 |
| N      | 2.36313   | 0.00719   | 0.230655  |
| H      | 0.797609  | 0.83087   | 0.114899  |
| H      | 2.238726  | -0.448973 | -0.67633  |
| O      | 3.167562  | -0.826189 | 2.222819  |
| C      | 3.475145  | 0.951418  | 0.185931  |
| H      | 3.202086  | 1.784558  | -0.471544 |
| H      | 3.65061   | 1.336044  | 1.189895  |
| C      | 4.746119  | 0.298615  | -0.346395 |

|   |           |           |           |   |          |           |           |
|---|-----------|-----------|-----------|---|----------|-----------|-----------|
| H | -5.073609 | 0.692518  | 0.168732  | H | 5.033922 | -0.511933 | 0.334794  |
| N | -4.459485 | 0.316637  | -1.768941 | N | 4.465826 | -0.287332 | -1.639263 |
| H | -4.466812 | -0.461465 | -2.427839 | H | 4.403835 | 0.454496  | -2.33478  |
| H | -5.118187 | 1.005877  | -2.121066 | H | 5.198507 | -0.926873 | -1.933183 |
| O | -5.992887 | -1.037695 | -0.53829  | O | 5.717969 | 1.326341  | -0.36097  |
| H | -6.717616 | -0.66577  | -0.020528 | H | 6.584861 | 0.926836  | -0.516801 |

**TS2**<sub>HO-EDA</sub>

| Symbol | X         | Y         | Z         |
|--------|-----------|-----------|-----------|
| C      | 3.327475  | -0.303813 | 0.208752  |
| O      | 2.786483  | -1.518583 | -0.865441 |
| N      | -3.246387 | 0.290321  | 0.246198  |
| H      | -2.844659 | -0.401518 | -0.462572 |
| H      | -2.370063 | 0.466586  | 0.773884  |
| C      | -3.686094 | 1.525781  | -0.450174 |
| H      | -4.033655 | 2.233131  | 0.308864  |
| H      | -4.538162 | 1.251803  | -1.078628 |
| C      | -4.248267 | -0.389753 | 1.101583  |
| H      | -5.105317 | -0.629696 | 0.466104  |
| H      | -4.577123 | 0.320219  | 1.866375  |
| C      | -3.629656 | -1.640794 | 1.70747   |
| H      | -3.269809 | -2.310587 | 0.921811  |
| H      | -2.778129 | -1.384849 | 2.34408   |
| H      | -4.370556 | -2.167776 | 2.312484  |
| C      | -2.538832 | 2.089865  | -1.276257 |
| H      | -2.16764  | 1.348613  | -1.989915 |
| H      | -2.883379 | 2.966539  | -1.829486 |
| H      | -1.700457 | 2.393681  | -0.643223 |
| S      | -0.397975 | -0.857024 | -0.710209 |
| O      | 0.304601  | -0.029378 | -1.722796 |
| O      | -1.738522 | -1.31198  | -1.178592 |
| O      | -0.570819 | -0.032344 | 0.562058  |
| H      | 1.760747  | -1.841487 | -0.696927 |
| O      | 0.456181  | -2.05903  | -0.357811 |
| N      | 2.483766  | -0.448844 | 1.357542  |
| H      | 3.412526  | -2.244852 | -0.7049   |
| H      | 1.587186  | -0.876185 | 1.124325  |
| O      | 4.533712  | -0.259065 | 0.229542  |
| C      | 2.28027   | 0.921353  | 1.812715  |
| H      | 1.388391  | 0.988845  | 2.436918  |
| H      | 3.151258  | 1.241162  | 2.390547  |
| C      | 2.111699  | 1.834981  | 0.557293  |
| H      | 2.748741  | 2.719397  | 0.607721  |
| N      | 2.631311  | 0.952929  | -0.558385 |
| H      | 1.8228    | 0.642255  | -1.148576 |
| H      | 3.344053  | 1.393831  | -1.140192 |
| O      | 0.825645  | 2.254273  | 0.311194  |
| H      | 0.232187  | 1.465552  | 0.393639  |

**I1**<sub>ME2N-EDA</sub>

| Symbol | X        | Y        | Z         |
|--------|----------|----------|-----------|
| C      | 1.720795 | 0.945585 | -1.487877 |
| O      | 0.661396 | 1.576958 | -1.423993 |

**P**<sub>HO-EDA</sub>

| Symbol | X         | Y         | Z         |
|--------|-----------|-----------|-----------|
| C      | -1.183982 | 1.50583   | 0.90858   |
| O      | -1.62084  | -2.115167 | 2.224906  |
| N      | 2.247193  | 0.782599  | 0.465119  |
| H      | 1.491535  | 1.117898  | 1.099216  |
| H      | 1.693126  | 0.292417  | -0.256638 |
| C      | 2.935298  | 1.950889  | -0.14983  |
| H      | 3.718379  | 1.56088   | -0.804162 |
| H      | 3.410323  | 2.506503  | 0.662844  |
| C      | 3.151486  | -0.198487 | 1.142144  |
| H      | 2.526979  | -0.765798 | 1.829826  |
| H      | 3.88392   | 0.383675  | 1.708687  |
| C      | 3.801849  | -1.12772  | 0.13164   |
| H      | 3.037444  | -1.700207 | -0.403733 |
| H      | 4.422878  | -0.588881 | -0.589982 |
| H      | 4.445604  | -1.836902 | 0.657222  |
| C      | 1.947497  | 2.81534   | -0.916378 |
| H      | 1.177132  | 3.192947  | -0.240397 |
| H      | 2.473322  | 3.658881  | -1.369342 |
| H      | 1.472034  | 2.23663   | -1.714287 |
| S      | 0.024915  | -1.678187 | -0.681402 |
| O      | 0.288515  | -0.22623  | -1.427657 |
| O      | 0.589704  | -1.437031 | 0.663815  |
| O      | 0.751503  | -2.650825 | -1.471962 |
| H      | -1.932953 | -2.337461 | 1.330207  |
| O      | -1.45139  | -1.821362 | -0.66783  |
| N      | -2.008855 | 0.533024  | 1.347033  |
| H      | -0.659478 | -2.09441  | 2.073333  |
| H      | -1.709017 | -0.266311 | 1.914666  |
| O      | -0.087708 | 1.842614  | 1.362825  |
| C      | -3.213735 | 0.455865  | 0.544366  |
| H      | -3.460214 | -0.578756 | 0.294718  |
| H      | -4.064313 | 0.912109  | 1.062231  |
| C      | -2.842256 | 1.276619  | -0.705342 |
| H      | -3.676545 | 1.862132  | -1.095543 |
| N      | -1.821006 | 2.137703  | -0.153984 |
| H      | -0.579774 | 0.193631  | -1.649951 |
| H      | -1.258194 | 2.716582  | -0.762515 |
| O      | -2.340236 | 0.483523  | -1.769374 |
| H      | -2.345476 | -0.46203  | -1.500006 |

**TS1**<sub>ME2N-EDA</sub>

| Symbol | X        | Y        | Z         |
|--------|----------|----------|-----------|
| C      | 1.725844 | 1.438654 | -1.057748 |
| O      | 0.65389  | 1.991928 | -0.796737 |

|   |           |           |           |   |           |           |           |
|---|-----------|-----------|-----------|---|-----------|-----------|-----------|
| N | -4.798058 | 0.025401  | 0.149087  | N | -4.81676  | -0.030065 | 0.171007  |
| H | -4.077293 | 0.022419  | -0.617395 | H | -4.113876 | 0.253733  | -0.557784 |
| H | -4.158059 | -0.241439 | 0.934689  | H | -4.160684 | -0.566372 | 0.78789   |
| C | -5.311075 | 1.40273   | 0.357935  | C | -5.319168 | 1.16991   | 0.886256  |
| H | -5.977115 | 1.378129  | 1.225295  | H | -5.964363 | 0.822773  | 1.698479  |
| H | -5.902583 | 1.669575  | -0.522485 | H | -5.930494 | 1.740328  | 0.1812    |
| C | -5.798464 | -1.044135 | -0.085325 | C | -5.826897 | -0.941325 | -0.419854 |
| H | -6.380438 | -0.762142 | -0.967311 | H | -6.427087 | -0.355875 | -1.122074 |
| H | -6.470274 | -1.063822 | 0.777625  | H | -6.479416 | -1.281049 | 0.389572  |
| C | -5.078851 | -2.370789 | -0.279158 | C | -5.117872 | -2.099939 | -1.105672 |
| H | -4.396059 | -2.318652 | -1.131594 | H | -4.454111 | -1.734479 | -1.893975 |
| H | -4.488115 | -2.623475 | 0.605628  | H | -4.508724 | -2.658871 | -0.390011 |
| H | -5.805421 | -3.166486 | -0.456782 | H | -5.851973 | -2.776793 | -1.547898 |
| C | -4.137222 | 2.348987  | 0.564481  | C | -4.137101 | 1.978646  | 1.400643  |
| H | -3.478821 | 2.349121  | -0.308562 | H | -3.499476 | 2.305316  | 0.574574  |
| H | -4.503987 | 3.364459  | 0.729238  | H | -4.495865 | 2.859229  | 1.937938  |
| H | -3.537126 | 2.044949  | 1.426727  | H | -3.518057 | 1.380301  | 2.075024  |
| S | -1.636175 | -0.395953 | 0.186667  | S | -1.656631 | -0.4328   | -0.01107  |
| O | -2.498266 | -0.630584 | 1.367085  | O | -2.499441 | -1.087633 | 1.015344  |
| O | -2.434273 | -0.221141 | -1.055776 | O | -2.47474  | 0.189499  | -1.085026 |
| O | -0.550874 | -1.377625 | 0.034773  | O | -0.579809 | -1.287506 | -0.533778 |
| H | -0.378306 | 1.291354  | -0.301555 | H | -0.393075 | 1.314162  | 0.140757  |
| O | -0.957434 | 1.014116  | 0.492652  | O | -0.964066 | 0.764771  | 0.78385   |
| N | 1.860827  | -0.016533 | -0.191022 | N | 1.839593  | 0.04755   | -0.225054 |
| H | 1.018459  | -0.629118 | -0.161054 | H | 0.998428  | -0.523927 | -0.450618 |
| H | 1.827755  | 0.585885  | 0.645159  | H | 1.771278  | 0.282513  | 0.774627  |
| O | 2.662337  | 0.863182  | -2.238982 | O | 2.694572  | 1.654772  | -1.745062 |
| C | 3.114067  | -0.784534 | -0.131686 | C | 3.100363  | -0.686954 | -0.43544  |
| H | 2.988267  | -1.624325 | 0.560178  | H | 2.971511  | -1.726169 | -0.113868 |
| H | 3.313023  | -1.148405 | -1.138262 | H | 3.339499  | -0.659856 | -1.497743 |
| C | 4.23305   | 0.138711  | 0.370499  | C | 4.215145  | -0.023577 | 0.369525  |
| H | 4.393921  | 0.910853  | -0.401989 | H | 4.274387  | 1.021285  | 0.044206  |
| N | 3.734598  | 0.810061  | 1.563194  | N | 3.79683   | 0.008139  | 1.760633  |
| H | 3.879349  | 0.20427   | 2.370077  | H | 3.80518   | -0.920412 | 2.176009  |
| H | 4.218189  | 1.685095  | 1.735308  | H | 4.397349  | 0.605623  | 2.320727  |
| N | 5.453378  | -0.625994 | 0.6268    | N | 5.48236   | -0.696034 | 0.027028  |
| C | 6.546832  | 0.26311   | 0.994726  | C | 6.176343  | -1.357683 | 1.110861  |
| H | 7.436296  | -0.331889 | 1.216542  | H | 7.039479  | -1.885819 | 0.695937  |
| H | 6.798902  | 0.979567  | 0.191575  | H | 6.547486  | -0.673054 | 1.89531   |
| H | 6.293221  | 0.827258  | 1.895027  | H | 5.538807  | -2.110292 | 1.584369  |
| C | 5.851482  | -1.437617 | -0.519114 | C | 6.362674  | 0.172771  | -0.735507 |
| H | 6.818336  | -1.899108 | -0.303506 | H | 7.189529  | -0.412572 | -1.148645 |
| H | 5.136129  | -2.24419  | -0.691638 | H | 5.808113  | 0.614079  | -1.568618 |
| H | 5.948556  | -0.846716 | -1.446979 | H | 6.788854  | 0.994202  | -0.130662 |

**I2**<sub>ME2N-EDA</sub>

| Symbol | X         | Y         | Z        |
|--------|-----------|-----------|----------|
| C      | 1.684614  | -1.416778 | 1.193256 |
| O      | 0.781425  | -2.333302 | 0.860973 |
| N      | -4.652656 | 0.470281  | 0.115889 |
| H      | -3.906597 | -0.078783 | 0.615337 |
| H      | -4.108252 | 0.695064  | -0.74603 |
| C      | -5.802138 | -0.408817 | -0.21265 |

**TS2**<sub>ME2N-EDA</sub>

| Symbol | X         | Y         | Z         |
|--------|-----------|-----------|-----------|
| C      | 3.013146  | -0.984524 | 0.445104  |
| O      | 2.422123  | -2.317145 | -0.602773 |
| N      | -3.218551 | 0.369715  | 0.222164  |
| H      | -3.135396 | -0.265502 | -0.605655 |
| H      | -2.249243 | 0.164173  | 0.62241   |
| C      | -3.287198 | 1.784329  | -0.212564 |



|   |           |           |           |   |           |           |           |
|---|-----------|-----------|-----------|---|-----------|-----------|-----------|
| H | -6.510331 | 0.179094  | -0.803357 | H | -3.283154 | 2.403776  | 0.68966   |
| H | -6.284303 | -0.682506 | 0.729859  | H | -4.243021 | 1.933615  | -0.724221 |
| C | -4.944617 | 1.718873  | 0.866207  | C | -4.279824 | -0.113695 | 1.133895  |
| H | -5.439577 | 1.431184  | 1.797945  | H | -5.242303 | 0.02148   | 0.631075  |
| H | -5.648722 | 2.305113  | 0.268891  | H | -4.267196 | 0.523797  | 2.02304   |
| C | -3.644784 | 2.468867  | 1.119601  | C | -4.018101 | -1.572608 | 1.479602  |
| H | -2.950996 | 1.859072  | 1.704901  | H | -3.996854 | -2.186799 | 0.575498  |
| H | -3.1483   | 2.720504  | 0.178132  | H | -3.049003 | -1.682065 | 1.973867  |
| H | -3.85047  | 3.391367  | 1.666789  | H | -4.799729 | -1.945569 | 2.145081  |
| C | -5.300471 | -1.629489 | -0.969669 | C | -2.09733  | 2.089835  | -1.112797 |
| H | -4.57621  | -2.186313 | -0.368763 | H | -2.1132   | 1.458747  | -2.006559 |
| H | -6.137356 | -2.28803  | -1.211223 | H | -2.130867 | 3.1378    | -1.423868 |
| H | -4.807332 | -1.333905 | -1.899941 | H | -1.152851 | 1.892391  | -0.591887 |
| S | -1.575152 | -0.144075 | -0.534123 | S | -0.67587  | -1.252605 | -0.743604 |
| O | -2.483365 | 0.523828  | -1.48624  | O | 0.215341  | -0.475823 | -1.671373 |
| O | -2.306985 | -0.688754 | 0.640055  | O | -2.02861  | -1.433123 | -1.327813 |
| O | -0.651087 | 1.037822  | 0.021281  | O | -0.775343 | -0.500869 | 0.573614  |
| H | 0.212863  | -2.035258 | 0.111207  | H | 1.372045  | -2.505055 | -0.577294 |
| O | -0.666227 | -1.13467  | -1.13702  | O | -0.028203 | -2.5853   | -0.450087 |
| N | 1.720952  | -0.297629 | 0.321989  | N | 2.06033   | -0.937601 | 1.509135  |
| H | 0.221395  | 0.62549   | 0.306533  | H | 2.901176  | -3.088825 | -0.259423 |
| H | 1.616575  | -0.582421 | -0.655427 | H | 1.162079  | -1.325519 | 1.218055  |
| O | 2.392551  | -1.510769 | 2.163493  | O | 4.207207  | -1.076163 | 0.556559  |
| C | 2.884602  | 0.574925  | 0.474929  | C | 1.877616  | 0.49394   | 1.767183  |
| H | 2.639027  | 1.527914  | -0.006892 | H | 0.827092  | 0.670126  | 1.999828  |
| H | 3.057966  | 0.746069  | 1.537121  | H | 2.515245  | 0.818572  | 2.592937  |
| C | 4.129078  | -0.05419  | -0.155625 | C | 2.258253  | 1.271323  | 0.460224  |
| H | 4.271528  | -1.020105 | 0.341471  | H | 3.221561  | 1.798182  | 0.588063  |
| N | 3.823535  | -0.338342 | -1.557848 | N | 2.498279  | 0.180658  | -0.511031 |
| H | 3.801801  | 0.519437  | -2.10631  | H | 1.578078  | -0.09588  | -1.003824 |
| H | 4.517707  | -0.95166  | -1.975343 | H | 3.230283  | 0.381938  | -1.192876 |
| N | 5.323128  | 0.733976  | 0.140104  | N | 1.216292  | 2.170063  | 0.011464  |
| C | 6.541005  | -0.002296 | -0.145521 | C | 1.457339  | 2.667022  | -1.336373 |
| H | 7.403253  | 0.562684  | 0.220982  | H | 1.356311  | 1.852319  | -2.058014 |
| H | 6.520011  | -0.965551 | 0.372259  | H | 0.693302  | 3.411188  | -1.576961 |
| H | 6.696234  | -0.187208 | -1.224963 | H | 2.448365  | 3.146075  | -1.443748 |
| C | 5.358682  | 2.037057  | -0.498964 | C | 1.085707  | 3.272817  | 0.951601  |
| H | 6.230369  | 2.587543  | -0.133559 | H | 0.8754    | 2.894544  | 1.955314  |
| H | 5.439832  | 1.985039  | -1.6008   | H | 1.995298  | 3.899226  | 0.999729  |
| H | 4.471275  | 2.621208  | -0.243515 | H | 0.248293  | 3.905845  | 0.645047  |

**P<sub>MEZN-EDA</sub>**

| Symbol | X         | Y         | Z         |
|--------|-----------|-----------|-----------|
| C      | -1.539943 | 1.071835  | 1.635136  |
| O      | -0.074002 | -2.703438 | 2.077199  |
| N      | 3.26361   | 0.741885  | -0.174345 |
| H      | 2.500901  | 0.274606  | 0.400952  |
| H      | 2.940259  | 0.478219  | -1.12191  |
| C      | 3.227044  | 2.215358  | 0.026553  |
| H      | 3.949083  | 2.658074  | -0.666422 |
| H      | 3.573463  | 2.400915  | 1.046963  |
| C      | 4.568107  | 0.083389  | 0.10088   |
| H      | 4.826277  | 0.317264  | 1.137391  |

**I<sub>ETA</sub>**

| Symbol | X         | Y         | Z         |
|--------|-----------|-----------|-----------|
| C      | 2.830861  | 0.58747   | -1.324673 |
| O      | 1.84548   | 1.327797  | -1.32314  |
| N      | -3.830679 | 0.191074  | 0.056819  |
| H      | -3.093978 | 0.14544   | -0.691279 |
| H      | -3.228313 | -0.113522 | 0.858297  |
| C      | -4.264887 | 1.596925  | 0.255868  |
| H      | -4.94842  | 1.612129  | 1.109646  |
| H      | -4.821668 | 1.897879  | -0.636099 |
| C      | -4.888096 | -0.816166 | -0.20364  |
| H      | -5.429536 | -0.500076 | -1.099731 |

|   |           |           |           |   |           |           |           |
|---|-----------|-----------|-----------|---|-----------|-----------|-----------|
| H | 5.315833  | 0.546331  | -0.549985 | H | -5.581058 | -0.79405  | 0.642283  |
| C | 4.46197   | -1.416481 | -0.127094 | C | -4.2458   | -2.184256 | -0.379923 |
| H | 3.680505  | -1.845905 | 0.504832  | H | -3.540465 | -2.175226 | -1.215417 |
| H | 4.20518   | -1.640764 | -1.16469  | H | -3.693944 | -2.471543 | 0.519318  |
| H | 5.415751  | -1.890332 | 0.116004  | H | -5.014821 | -2.934495 | -0.575626 |
| C | 1.817782  | 2.74359   | -0.186776 | C | -3.041251 | 2.471728  | 0.486862  |
| H | 1.109882  | 2.303409  | 0.523865  | H | -2.3684   | 2.435087  | -0.374286 |
| H | 1.818815  | 3.827996  | -0.05002  | H | -3.350431 | 3.506728  | 0.648026  |
| H | 1.465324  | 2.520277  | -1.197864 | H | -2.476232 | 2.131108  | 1.359107  |
| S | 0.592134  | -0.902316 | -0.699504 | S | -0.699933 | -0.427187 | 0.186631  |
| O | -0.21855  | 0.410917  | -1.064589 | O | -1.609093 | -0.593992 | 1.342583  |
| O | 1.180776  | -0.661347 | 0.663894  | O | -1.445466 | -0.196311 | -1.077743 |
| O | 1.672557  | -0.973931 | -1.699803 | O | 0.316994  | -1.483284 | 0.067346  |
| H | -0.349381 | -2.833179 | 1.151944  | H | 0.699774  | 1.154986  | -0.253954 |
| O | -0.374395 | -2.009664 | -0.695063 | O | 0.071809  | 0.932369  | 0.514103  |
| N | -1.62919  | -0.271936 | 1.801683  | N | 2.833056  | -0.317457 | 0.036305  |
| H | 0.725074  | -2.167929 | 1.941954  | H | 1.951813  | -0.875041 | 0.02953   |
| H | -0.870089 | -0.874412 | 2.108863  | H | 2.761688  | 0.322353  | 0.83586   |
| O | -0.665037 | 1.838906  | 1.988222  | O | 3.777543  | 0.354705  | -2.034671 |
| C | -2.82568  | -0.824366 | 1.21489   | C | 4.029179  | -1.162034 | 0.21366   |
| H | -2.59666  | -1.741526 | 0.672293  | H | 3.812698  | -1.906299 | 0.984513  |
| H | -3.59216  | -1.03619  | 1.970371  | H | 4.238254  | -1.651031 | -0.73771  |
| C | -3.308547 | 0.322753  | 0.29935   | C | 5.191801  | -0.283618 | 0.634253  |
| H | -4.406666 | 0.389417  | 0.264716  | H | 6.065773  | -0.913192 | 0.844578  |
| N | -2.727524 | 1.451728  | 0.977297  | H | 5.43361   | 0.40248   | -0.184627 |
| H | -1.244211 | 0.216882  | -1.034113 | O | 4.760222  | 0.412412  | 1.79296   |
| H | -2.738856 | 2.380164  | 0.581727  | H | 5.355194  | 1.156092  | 1.95366   |
| N | -2.799001 | 0.180459  | -1.089854 |   |           |           |           |
| C | -3.127432 | 1.362548  | -1.890485 |   |           |           |           |
| H | -2.629221 | 2.244888  | -1.484268 |   |           |           |           |
| H | -2.756861 | 1.215162  | -2.906983 |   |           |           |           |
| H | -4.213556 | 1.539514  | -1.92877  |   |           |           |           |
| C | -3.31239  | -1.022753 | -1.751982 |   |           |           |           |
| H | -2.950059 | -1.033234 | -2.781932 |   |           |           |           |
| H | -2.930865 | -1.918892 | -1.265634 |   |           |           |           |
| H | -4.413442 | -1.035423 | -1.762396 |   |           |           |           |

**TS1<sub>ETA</sub>**

| Symbol | X         | Y         | Z         |
|--------|-----------|-----------|-----------|
| C      | 2.87096   | 0.569799  | -1.251817 |
| O      | 1.89155   | 1.370718  | -1.415513 |
| N      | -3.759452 | 0.151089  | 0.15264   |
| H      | -3.068259 | 0.135953  | -0.646973 |
| H      | -3.088561 | -0.160008 | 0.897703  |
| C      | -4.199801 | 1.542787  | 0.415719  |
| H      | -4.828853 | 1.527788  | 1.310768  |
| H      | -4.815964 | 1.858712  | -0.431174 |
| C      | -4.814037 | -0.867865 | -0.056544 |
| H      | -5.425079 | -0.541701 | -0.90319  |
| H      | -5.445844 | -0.882052 | 0.836491  |
| C      | -4.161111 | -2.21805  | -0.314582 |
| H      | -3.516165 | -2.171533 | -1.196268 |
| H      | -3.539952 | -2.515082 | 0.534867  |

**I2<sub>ETA</sub>**

| Symbol | X         | Y         | Z         |
|--------|-----------|-----------|-----------|
| C      | 2.783619  | -0.598927 | 1.267499  |
| O      | 1.979573  | -1.656678 | 1.250867  |
| N      | -3.756249 | 0.221567  | 0.127435  |
| H      | -2.939392 | -0.083406 | 0.713988  |
| H      | -3.261777 | 0.267978  | -0.79132  |
| C      | -4.793469 | -0.839773 | 0.102912  |
| H      | -5.579088 | -0.518069 | -0.5865   |
| H      | -5.221313 | -0.902322 | 1.10727   |
| C      | -4.18702  | 1.583937  | 0.535302  |
| H      | -4.619798 | 1.503212  | 1.536304  |
| H      | -4.97336  | 1.900682  | -0.155664 |
| C      | -2.987545 | 2.520171  | 0.506137  |
| H      | -2.207034 | 2.175258  | 1.190063  |
| H      | -2.551398 | 2.565909  | -0.49576  |

|   |           |           |           |   |           |           |           |
|---|-----------|-----------|-----------|---|-----------|-----------|-----------|
| H | -4.927309 | -2.979547 | -0.475351 | H | -3.295455 | 3.525329  | 0.801986  |
| C | -2.976455 | 2.431498  | 0.592195  | C | -4.157668 | -2.153279 | -0.327396 |
| H | -2.353379 | 2.418604  | -0.306255 | H | -3.360527 | -2.441735 | 0.363268  |
| H | -3.289536 | 3.458729  | 0.791848  | H | -4.910852 | -2.94371  | -0.344492 |
| H | -2.356503 | 2.081183  | 1.422145  | H | -3.720516 | -2.064292 | -1.325847 |
| S | -0.619836 | -0.318999 | 0.008451  | S | -0.643797 | -0.184627 | -0.528432 |
| O | -1.431605 | -0.579376 | 1.227137  | O | -1.657697 | 0.096065  | -1.562561 |
| O | -1.494453 | -0.117668 | -1.184613 | O | -1.261659 | -0.47756  | 0.790764  |
| O | 0.368093  | -1.420975 | -0.242541 | O | 0.137422  | 1.202698  | -0.361304 |
| H | 1.040034  | 1.219646  | -0.685879 | H | 1.359815  | -1.636417 | 0.482822  |
| O | 0.192184  | 0.964119  | 0.251617  | O | 0.366981  | -1.187661 | -0.909122 |
| N | 2.683045  | -0.314664 | -0.02278  | N | 2.679372  | 0.234844  | 0.126964  |
| H | 1.736975  | -0.873898 | -0.141788 | H | 1.06051   | 0.990421  | -0.032836 |
| H | 2.509289  | 0.289945  | 0.792418  | H | 2.53253   | -0.300238 | -0.730687 |
| O | 3.874405  | 0.417036  | -1.894663 | O | 3.521976  | -0.347665 | 2.186741  |
| C | 3.82753   | -1.199965 | 0.278536  | C | 3.76076   | 1.208567  | -0.031596 |
| H | 3.468335  | -1.95242  | 0.984515  | H | 3.444624  | 1.935936  | -0.785146 |
| H | 4.144901  | -1.675235 | -0.648887 | H | 3.904361  | 1.716493  | 0.922531  |
| C | 4.949183  | -0.38354  | 0.893331  | C | 5.048131  | 0.538758  | -0.477441 |
| H | 5.751596  | -1.058434 | 1.217349  | H | 5.835947  | 1.294581  | -0.604707 |
| H | 5.347074  | 0.308321  | 0.142753  | H | 5.365717  | -0.171449 | 0.296614  |
| O | 4.36979   | 0.305115  | 1.988159  | O | 4.752127  | -0.114213 | -1.699636 |
| H | 4.972107  | 1.000312  | 2.282989  | H | 5.465276  | -0.731616 | -1.906257 |

**TS2<sub>ETA</sub>**

| Symbol | X         | Y         | Z         |
|--------|-----------|-----------|-----------|
| C      | 3.384727  | -0.194287 | 0.323189  |
| O      | 2.821053  | -1.331994 | -1.027315 |
| N      | -3.230233 | 0.047154  | 0.357548  |
| H      | -2.857962 | -0.255005 | -0.584665 |
| H      | -2.304692 | 0.31559   | 0.77201   |
| C      | -4.101718 | 1.236342  | 0.210551  |
| H      | -4.381563 | 1.571704  | 1.213607  |
| H      | -5.00966  | 0.917116  | -0.309091 |
| C      | -3.793097 | -1.121678 | 1.077526  |
| H      | -4.707281 | -1.418983 | 0.555633  |
| H      | -4.065438 | -0.791745 | 2.084498  |
| C      | -2.763772 | -2.242889 | 1.101711  |
| H      | -2.492829 | -2.545227 | 0.086426  |
| H      | -1.846429 | -1.919422 | 1.601333  |
| H      | -3.168988 | -3.107079 | 1.632682  |
| C      | -3.354975 | 2.312394  | -0.564002 |
| H      | -3.064937 | 1.945215  | -1.552213 |
| H      | -3.987785 | 3.194144  | -0.685063 |
| H      | -2.441918 | 2.603086  | -0.037228 |
| S      | -0.296738 | -0.318694 | -0.832565 |
| O      | 0.665143  | 0.524972  | -1.639451 |
| O      | -1.55613  | -0.511087 | -1.600938 |
| O      | -0.575406 | 0.367917  | 0.480612  |
| H      | 1.833544  | -1.593384 | -0.949933 |
| O      | 0.36133   | -1.64309  | -0.534364 |
| N      | 2.451015  | -0.407113 | 1.345925  |
| H      | 3.377966  | -2.119852 | -0.924706 |

**P<sub>ETA</sub>**

| Symbol | X         | Y         | Z         |
|--------|-----------|-----------|-----------|
| C      | -1.496082 | 1.618829  | 0.038271  |
| O      | -2.388291 | -2.35982  | 0.558156  |
| N      | 2.127674  | 1.001169  | 0.068689  |
| H      | 2.316048  | -0.021651 | -0.027373 |
| H      | 1.088518  | 1.116026  | 0.077918  |
| C      | 2.646751  | 1.478892  | 1.379778  |
| H      | 2.387647  | 2.538872  | 1.450942  |
| H      | 3.73619   | 1.385538  | 1.347379  |
| C      | 2.653381  | 1.760669  | -1.096922 |
| H      | 3.740972  | 1.644267  | -1.096257 |
| H      | 2.416526  | 2.812369  | -0.912525 |
| C      | 2.030742  | 1.273318  | -2.393081 |
| H      | 2.229496  | 0.212073  | -2.556042 |
| H      | 0.946363  | 1.406952  | -2.367803 |
| H      | 2.438232  | 1.849471  | -3.227609 |
| C      | 2.041372  | 0.679305  | 2.519838  |
| H      | 2.236779  | -0.388758 | 2.39423   |
| H      | 2.471524  | 1.015504  | 3.46653   |
| H      | 0.95928   | 0.823613  | 2.548384  |
| S      | 0.683381  | -1.893926 | -0.225369 |
| O      | 0.005476  | -1.123054 | 1.041496  |
| O      | 2.120028  | -1.792116 | 0.080646  |
| O      | 0.306734  | -1.07524  | -1.400757 |
| H      | -1.747653 | -2.919881 | 0.067962  |
| O      | 0.109705  | -3.242489 | -0.227859 |
| H      | -2.627986 | -2.893687 | 1.329175  |
| O      | -0.37054  | 2.051079  | 0.247033  |

|   |          |           |           |   |           |           |           |
|---|----------|-----------|-----------|---|-----------|-----------|-----------|
| H | 1.597118 | -0.836806 | 0.983877  | C | -3.734864 | 1.398059  | 0.313818  |
| O | 4.563497 | -0.187799 | 0.325997  | H | -3.960864 | 0.875468  | 1.248238  |
| C | 2.162126 | 0.93079   | 1.868898  | H | -4.576539 | 2.031233  | 0.03425   |
| H | 1.201385 | 0.908225  | 2.380761  | C | -3.300371 | 0.417518  | -0.789792 |
| H | 2.950326 | 1.214189  | 2.570035  | H | -3.62509  | -0.604913 | -0.590017 |
| C | 2.134306 | 1.889804  | 0.640533  | H | -3.646703 | 0.730225  | -1.781643 |
| H | 1.111024 | 2.15338   | 0.370027  | N | -1.863076 | 0.538597  | -0.67057  |
| H | 2.739542 | 2.783067  | 0.798016  | H | -0.961404 | -1.334662 | 1.017167  |
| O | 2.703313 | 1.145553  | -0.442888 | H | -1.164536 | -0.072347 | -1.106369 |
| H | 1.852927 | 0.821973  | -1.05294  | O | -2.594193 | 2.23654   | 0.535169  |

**I1<sub>EG</sub>**

| Symbol | X         | Y         | Z         |
|--------|-----------|-----------|-----------|
| C      | 2.081034  | -1.923868 | -1.237772 |
| O      | 1.514871  | -1.189913 | -1.94229  |
| N      | -3.622352 | 0.390989  | -0.04296  |
| H      | -2.940108 | -0.195601 | -0.584523 |
| H      | -2.98639  | 0.649362  | 0.746514  |
| C      | -3.972984 | 1.605227  | -0.824351 |
| H      | -4.607846 | 2.231178  | -0.190835 |
| H      | -4.561278 | 1.279968  | -1.686988 |
| C      | -4.744336 | -0.446042 | 0.448916  |
| H      | -5.325778 | -0.760149 | -0.422361 |
| H      | -5.378738 | 0.187486  | 1.07521   |
| C      | -4.186211 | -1.633423 | 1.219139  |
| H      | -3.536603 | -2.238277 | 0.58054   |
| H      | -3.594857 | -1.296953 | 2.075191  |
| H      | -5.003847 | -2.259512 | 1.582407  |
| C      | -2.696389 | 2.321287  | -1.240835 |
| H      | -2.067402 | 1.672317  | -1.856598 |
| H      | -2.944829 | 3.217288  | -1.813726 |
| H      | -2.10893  | 2.614155  | -0.366074 |
| S      | -0.493966 | -0.193958 | 0.356918  |
| O      | -1.330353 | 0.506295  | 1.355663  |
| O      | -1.324527 | -0.816163 | -0.70315  |
| O      | 0.515724  | -1.101098 | 0.913695  |
| H      | 1.224641  | 0.701228  | -0.555928 |
| O      | 0.314691  | 1.009437  | -0.353665 |
| H      | 2.278104  | -0.405114 | 0.951527  |
| O      | 2.670179  | -2.676611 | -0.575453 |
| C      | 4.223436  | -0.070646 | 0.634687  |
| H      | 4.400095  | -0.152771 | 1.713574  |
| H      | 4.568357  | -0.990525 | 0.145294  |
| C      | 4.948356  | 1.148158  | 0.098774  |
| H      | 6.022616  | 1.062938  | 0.285237  |
| H      | 4.793068  | 1.20477   | -0.990248 |
| O      | 4.495451  | 2.313625  | 0.743825  |
| H      | 3.526861  | 2.252172  | 0.74172   |
| O      | 2.842131  | 0.152963  | 0.38247   |

**I2<sub>EG</sub>**

| Symbol | X        | Y         | Z        |
|--------|----------|-----------|----------|
| C      | 3.438358 | -0.773549 | 0.194409 |

**TS1<sub>EG</sub>**

| Symbol | X         | Y         | Z         |
|--------|-----------|-----------|-----------|
| C      | 2.927892  | 1.171394  | -0.991531 |
| O      | 1.879392  | 1.824498  | -0.888074 |
| N      | -3.767433 | 0.008824  | 0.093523  |
| H      | -3.083343 | 0.243695  | -0.661477 |
| H      | -3.109894 | -0.448264 | 0.762651  |
| C      | -4.298751 | 1.262984  | 0.693567  |
| H      | -4.941814 | 0.976166  | 1.530105  |
| H      | -4.916611 | 1.749518  | -0.066038 |
| C      | -4.762987 | -0.975717 | -0.403526 |
| H      | -5.37591  | -0.469246 | -1.153947 |
| H      | -5.404326 | -1.246618 | 0.439537  |
| C      | -4.036424 | -2.181499 | -0.979503 |
| H      | -3.386759 | -1.88484  | -1.807567 |
| H      | -3.414449 | -2.660899 | -0.218413 |
| H      | -4.761022 | -2.910622 | -1.347791 |
| C      | -3.139606 | 2.14301   | 1.137446  |
| H      | -2.498576 | 2.403545  | 0.290581  |
| H      | -3.524921 | 3.063916  | 1.580137  |
| H      | -2.518924 | 1.631083  | 1.878228  |
| S      | -0.564842 | -0.213592 | 0.011332  |
| O      | -1.376985 | -0.834736 | 1.070076  |
| O      | -1.37305  | 0.223268  | -1.145284 |
| O      | 0.560383  | -1.119554 | -0.436762 |
| H      | 0.865736  | 1.424326  | 0.002137  |
| O      | 0.121809  | 1.030292  | 0.657941  |
| H      | 1.694585  | -0.617828 | -0.33687  |
| O      | 4.00683   | 1.291727  | -1.495705 |
| C      | 3.814575  | -1.127766 | -0.321588 |
| H      | 3.342395  | -2.104145 | -0.185667 |
| H      | 4.272905  | -1.048639 | -1.30867  |
| C      | 4.801151  | -0.846232 | 0.793479  |
| H      | 5.607672  | -1.584016 | 0.761082  |
| H      | 5.238547  | 0.148945  | 0.634631  |
| O      | 4.187811  | -0.960571 | 2.055711  |
| H      | 3.454669  | -0.327142 | 2.072567  |
| O      | 2.748116  | -0.162459 | -0.226808 |

**TS2<sub>EG</sub>**

| Symbol | X        | Y         | Z        |
|--------|----------|-----------|----------|
| C      | 3.260112 | -0.252628 | 0.223519 |

|   |           |           |           |   |           |           |           |
|---|-----------|-----------|-----------|---|-----------|-----------|-----------|
| O | 3.152935  | -1.858003 | -0.490589 | O | 2.726587  | -1.264185 | -0.813093 |
| N | -3.157228 | 0.394718  | 0.232866  | N | -3.223886 | -0.00609  | 0.390475  |
| H | -2.247859 | 0.324197  | 0.75164   | H | -2.927018 | -0.241889 | -0.583512 |
| H | -2.888039 | -0.199976 | -0.589427 | H | -2.292769 | 0.288045  | 0.765029  |
| C | -4.245462 | -0.260045 | 0.999982  | C | -4.162426 | 1.14467   | 0.377156  |
| H | -5.144318 | -0.241572 | 0.377231  | H | -4.381185 | 1.401429  | 1.417261  |
| H | -4.432206 | 0.346655  | 1.890653  | H | -5.088454 | 0.806573  | -0.095732 |
| C | -3.380084 | 1.797113  | -0.200062 | C | -3.676307 | -1.239836 | 1.089068  |
| H | -3.582855 | 2.389874  | 0.696526  | H | -4.608449 | -1.558484 | 0.614429  |
| H | -4.274889 | 1.808455  | -0.828818 | H | -3.893214 | -0.96529  | 2.125087  |
| C | -2.152536 | 2.296884  | -0.94897  | C | -2.592781 | -2.304069 | 0.994037  |
| H | -1.264761 | 2.276813  | -0.309607 | H | -2.377734 | -2.553636 | -0.048791 |
| H | -1.946726 | 1.668614  | -1.820572 | H | -1.660498 | -1.95929  | 1.450376  |
| H | -2.320913 | 3.32226   | -1.286232 | H | -2.920765 | -3.209222 | 1.50962   |
| C | -3.826958 | -1.679415 | 1.354215  | C | -3.527678 | 2.303571  | -0.376342 |
| H | -2.918154 | -1.67467  | 1.962493  | H | -3.297826 | 2.017946  | -1.406568 |
| H | -4.622509 | -2.172585 | 1.916654  | H | -4.210472 | 3.155518  | -0.393178 |
| H | -3.620155 | -2.259861 | 0.45113   | H | -2.594151 | 2.612131  | 0.102249  |
| S | -0.382333 | -0.957994 | -0.576054 | S | -0.302327 | -0.240284 | -0.886717 |
| O | -1.65116  | -1.192248 | -1.301666 | O | 0.685111  | 0.614638  | -1.708982 |
| O | -0.604353 | -0.250717 | 0.716373  | O | -1.533849 | -0.402379 | -1.678312 |
| O | 0.388056  | 0.106783  | -1.502346 | O | -0.553287 | 0.427656  | 0.415884  |
| H | 2.171742  | -2.014641 | -0.490587 | H | 1.577284  | -1.517317 | -0.694806 |
| O | 0.456467  | -2.153052 | -0.472552 | O | 0.353815  | -1.594966 | -0.67641  |
| H | 0.914537  | 0.711399  | -0.92291  | H | 3.352752  | -2.006174 | -0.778781 |
| O | 4.541644  | -0.329694 | 0.383153  | O | 4.454561  | -0.328656 | 0.414857  |
| C | 2.469816  | 0.983503  | 1.440938  | C | 2.212265  | 0.921159  | 1.833005  |
| H | 1.528112  | 1.096884  | 1.981543  | H | 1.248809  | 0.992219  | 2.337621  |
| H | 3.305027  | 0.868097  | 2.135963  | H | 3.031018  | 1.08507   | 2.542172  |
| C | 2.707982  | 2.169339  | 0.532172  | C | 2.318857  | 1.880299  | 0.619163  |
| H | 2.821369  | 3.0805    | 1.132855  | H | 1.350038  | 2.315799  | 0.359219  |
| H | 3.622729  | 2.002253  | -0.045504 | H | 3.056147  | 2.67077   | 0.773069  |
| O | 1.571159  | 2.275601  | -0.324303 | O | 2.734102  | 1.041539  | -0.453939 |
| H | 1.799895  | 2.823451  | -1.088013 | H | 1.644411  | 0.790258  | -1.182423 |
| O | 2.301653  | -0.19795  | 0.67139   | O | 2.308493  | -0.363182 | 1.260517  |

| <b>P<sub>EG</sub></b> |           |           |           | <b>I<sub>ME</sub></b> |           |           |           |
|-----------------------|-----------|-----------|-----------|-----------------------|-----------|-----------|-----------|
| Symbol                | X         | Y         | Z         | Symbol                | X         | Y         | Z         |
| C                     | 2.503955  | 0.686139  | 1.007941  | C                     | 1.214897  | 1.799507  | -1.454955 |
| O                     | 2.845145  | -2.21148  | -0.369123 | O                     | 0.987016  | 2.699161  | -0.74467  |
| N                     | -2.766671 | 0.31459   | 0.289338  | N                     | -2.898045 | -1.222328 | -0.409039 |
| H                     | -2.654363 | -0.385498 | -0.479516 | H                     | -2.01387  | -0.763411 | -0.726182 |
| H                     | -1.743468 | 0.474371  | 0.483497  | H                     | -2.983193 | -0.745757 | 0.520253  |
| C                     | -3.381867 | 1.553847  | -0.245736 | C                     | -4.028421 | -0.830908 | -1.288953 |
| H                     | -3.357778 | 2.302156  | 0.551612  | H                     | -4.938821 | -1.259633 | -0.861268 |
| H                     | -4.427879 | 1.33264   | -0.47592  | H                     | -3.85872  | -1.288651 | -2.267442 |
| C                     | -3.419083 | -0.30487  | 1.472111  | C                     | -2.667028 | -2.676767 | -0.208431 |
| H                     | -4.451995 | -0.533497 | 1.194351  | H                     | -2.481094 | -3.117789 | -1.191637 |
| H                     | -3.43474  | 0.447606  | 2.26569   | H                     | -3.591583 | -3.102446 | 0.191129  |
| C                     | -2.647933 | -1.550132 | 1.883475  | C                     | -1.492868 | -2.875581 | 0.738913  |
| H                     | -2.623165 | -2.284101 | 1.073058  | H                     | -0.586288 | -2.414723 | 0.335795  |
| H                     | -1.611745 | -1.307772 | 2.135319  | H                     | -1.69638  | -2.419925 | 1.711919  |
| H                     | -3.124012 | -2.006563 | 2.754105  | H                     | -1.308887 | -3.942256 | 0.882754  |

|   |           |           |           |   |           |           |           |
|---|-----------|-----------|-----------|---|-----------|-----------|-----------|
| C | -2.61365  | 2.007131  | -1.478452 | C | -4.098341 | 0.686668  | -1.371711 |
| H | -3.032839 | 2.941355  | -1.857901 | H | -3.179199 | 1.095054  | -1.800842 |
| H | -1.558567 | 2.163166  | -1.235473 | H | -4.93958  | 0.986676  | -1.999965 |
| H | -2.658394 | 1.250092  | -2.265362 | H | -4.228084 | 1.125264  | -0.378152 |
| S | -0.148439 | -1.130979 | -0.707305 | S | -0.99928  | 0.871065  | 1.129386  |
| O | 1.014108  | -1.003779 | -1.778031 | O | -2.265542 | 0.345008  | 1.673331  |
| O | -1.40274  | -1.167173 | -1.492777 | O | -0.717795 | 0.35311   | -0.242524 |
| O | -0.094159 | 0.128004  | 0.114853  | O | 0.152844  | 0.762788  | 2.021677  |
| H | 2.104269  | -2.700464 | 0.034709  | H | -0.534019 | 2.845562  | 0.52182   |
| O | 0.102922  | -2.330755 | 0.0958    | O | -1.323235 | 2.437273  | 0.931123  |
| H | 3.137466  | -1.607532 | 0.340725  | H | 1.755643  | 0.667946  | 1.103135  |
| O | 2.889981  | -0.223627 | 1.688862  | O | 1.423965  | 0.980024  | -2.249666 |
| C | 1.453501  | 2.589154  | 0.374142  | C | 2.303146  | -0.870957 | 0.051644  |
| H | 0.363723  | 2.625836  | 0.35103   | H | 2.266475  | -1.500055 | 0.952179  |
| H | 1.862101  | 3.588774  | 0.536408  | H | 1.398071  | -1.057244 | -0.546249 |
| C | 2.037438  | 1.883846  | -0.865458 | C | 3.519449  | -1.237318 | -0.776375 |
| H | 1.269884  | 1.500438  | -1.537687 | H | 3.482997  | -2.29852  | -1.033795 |
| H | 2.758609  | 2.4968    | -1.408865 | H | 3.526077  | -0.643809 | -1.693587 |
| O | 2.729219  | 0.770096  | -0.311152 | O | 2.40356   | 0.491034  | 0.394397  |
| H | 1.858271  | -1.380143 | -1.348186 | S | 5.036495  | -0.891735 | 0.193527  |
| O | 1.849546  | 1.761862  | 1.463042  | H | 5.809827  | -1.794305 | -0.433328 |

| <b>TS1<sub>ME</sub></b> |           |           |           | <b>I2<sub>ME</sub></b> |           |           |           |
|-------------------------|-----------|-----------|-----------|------------------------|-----------|-----------|-----------|
| Symbol                  | X         | Y         | Z         | Symbol                 | X         | Y         | Z         |
| C                       | 2.556968  | 1.463033  | -0.996267 | C                      | -2.48133  | 1.762559  | 0.651386  |
| O                       | 1.511909  | 2.03765   | -0.666767 | O                      | -1.69883  | 2.425597  | -0.176305 |
| N                       | -4.012612 | -0.046065 | 0.166364  | N                      | 3.587118  | -0.058167 | 0.369648  |
| H                       | -3.357085 | 0.321432  | -0.56053  | H                      | 2.680499  | 0.340897  | 0.715247  |
| H                       | -3.328819 | -0.605477 | 0.722823  | H                      | 3.232463  | -0.458564 | -0.528294 |
| C                       | -4.526705 | 1.080482  | 0.992141  | C                      | 4.560942  | 1.02982   | 0.10242   |
| H                       | -5.135198 | 0.646791  | 1.790463  | H                      | 5.453362  | 0.573046  | -0.334419 |
| H                       | -5.176415 | 1.682456  | 0.350962  | H                      | 4.835142  | 1.468142  | 1.065933  |
| C                       | -5.022114 | -0.940256 | -0.456662 | C                      | 4.026632  | -1.155933 | 1.269978  |
| H                       | -5.66346  | -0.318935 | -1.087595 | H                      | 4.304173  | -0.702563 | 2.225623  |
| H                       | -5.631818 | -1.356858 | 0.349708  | H                      | 4.92118   | -1.604025 | 0.828418  |
| C                       | -4.313548 | -2.023752 | -1.255102 | C                      | 2.897688  | -2.165025 | 1.423431  |
| H                       | -3.69622  | -1.584565 | -2.043615 | H                      | 2.006446  | -1.691595 | 1.844887  |
| H                       | -3.661748 | -2.618877 | -0.609452 | H                      | 2.619489  | -2.591298 | 0.455438  |
| H                       | -5.049039 | -2.686777 | -1.715356 | H                      | 3.212765  | -2.974084 | 2.085882  |
| C                       | -3.355964 | 1.885114  | 1.536807  | C                      | 3.929123  | 2.053122  | -0.829259 |
| H                       | -2.750127 | 2.29525   | 0.72399   | H                      | 3.028916  | 2.482176  | -0.380518 |
| H                       | -3.728711 | 2.711421  | 2.145799  | H                      | 4.637004  | 2.859438  | -1.031893 |
| H                       | -2.703115 | 1.261558  | 2.154146  | H                      | 3.644417  | 1.590557  | -1.778402 |
| S                       | -0.817619 | -0.219357 | -0.049546 | S                      | 0.581909  | -0.235276 | -0.762268 |
| O                       | -1.593418 | -1.036216 | 0.897263  | O                      | 1.766408  | -0.72623  | -1.496059 |
| O                       | -1.66084  | 0.389134  | -1.099473 | O                      | 0.970487  | 0.52471   | 0.451007  |
| O                       | 0.318148  | -1.005049 | -0.665684 | O                      | -0.136436 | -1.577681 | -0.236046 |
| H                       | 0.559056  | 1.437029  | 0.205265  | H                      | -1.083904 | 1.798046  | -0.629476 |
| O                       | -0.151674 | 0.913763  | 0.792696  | O                      | -0.408457 | 0.469461  | -1.58986  |
| H                       | 1.43919   | -0.473191 | -0.574108 | H                      | -1.099832 | -1.524085 | -0.429257 |
| O                       | 3.575217  | 1.722237  | -1.573429 | O                      | -3.442817 | 2.215116  | 1.213976  |
| C                       | 3.554078  | -0.872716 | -0.904864 | C                      | -2.964298 | -0.400404 | 1.445594  |
| H                       | 3.152252  | -1.88692  | -0.830938 | H                      | -2.357131 | -1.252829 | 1.75875   |

|   |          |           |           |   |           |           |           |
|---|----------|-----------|-----------|---|-----------|-----------|-----------|
| H | 3.824547 | -0.642577 | -1.937722 | H | -3.395391 | 0.098473  | 2.317185  |
| C | 4.754576 | -0.685086 | 0.000654  | C | -4.05988  | -0.830653 | 0.482023  |
| H | 5.523565 | -1.403821 | -0.292929 | H | -4.669933 | -1.619959 | 0.928438  |
| H | 5.139307 | 0.328781  | -0.120185 | H | -4.712563 | 0.013465  | 0.248324  |
| O | 2.489828 | -0.001029 | -0.504123 | O | -2.060268 | 0.475174  | 0.785261  |
| S | 4.25713  | -0.98247  | 1.737904  | S | -3.384861 | -1.529112 | -1.067567 |
| H | 5.50284  | -1.159871 | 2.206886  | H | -2.893646 | -0.37796  | -1.561277 |

**TS2<sub>ME</sub>**

| Symbol | X         | Y         | Z         |
|--------|-----------|-----------|-----------|
| C      | 3.139787  | -0.619965 | 0.266039  |
| O      | 2.583556  | -1.349707 | -0.948755 |
| N      | -3.380139 | -0.037725 | 0.439891  |
| H      | -3.110553 | -0.188771 | -0.558133 |
| H      | -2.444675 | 0.221666  | 0.819559  |
| C      | -4.318194 | 1.110029  | 0.547859  |
| H      | -4.510306 | 1.277091  | 1.611117  |
| H      | -5.255312 | 0.810378  | 0.071219  |
| C      | -3.819386 | -1.328376 | 1.039327  |
| H      | -4.758906 | -1.606669 | 0.554373  |
| H      | -4.01902  | -1.14264  | 2.098174  |
| C      | -2.73772  | -2.379256 | 0.836335  |
| H      | -2.53965  | -2.53901  | -0.227362 |
| H      | -1.799101 | -2.075344 | 1.308498  |
| H      | -3.05885  | -3.325585 | 1.276685  |
| C      | -3.702288 | 2.329169  | -0.121201 |
| H      | -3.497748 | 2.131972  | -1.177215 |
| H      | -4.386277 | 3.177302  | -0.050576 |
| H      | -2.758524 | 2.601713  | 0.359431  |
| S      | -0.507826 | -0.169096 | -0.986411 |
| O      | 0.403641  | 0.809005  | -1.783007 |
| O      | -1.772315 | -0.274839 | -1.728925 |
| O      | -0.686308 | 0.344309  | 0.387977  |
| H      | 1.375446  | -1.475397 | -0.929049 |
| O      | 0.185131  | -1.521588 | -0.986359 |
| H      | 3.099327  | -2.174941 | -0.989633 |
| O      | 4.255021  | -0.971439 | 0.589509  |
| C      | 2.124412  | 0.461364  | 2.019481  |
| H      | 1.253906  | 0.400508  | 2.673809  |
| H      | 3.044994  | 0.390233  | 2.610199  |
| C      | 2.112487  | 1.757078  | 1.183427  |
| H      | 1.084929  | 2.067006  | 0.981187  |
| H      | 2.638255  | 2.560353  | 1.703214  |
| H      | 1.32457   | 1.014357  | -1.300736 |
| O      | 2.043941  | -0.635545 | 1.137029  |
| S      | 2.950485  | 1.353973  | -0.381174 |

**I1<sub>EDT</sub>**

| Symbol | X         | Y         | Z         |
|--------|-----------|-----------|-----------|
| C      | -2.38998  | -0.736992 | 1.568473  |
| O      | -2.629784 | -1.802264 | 1.161968  |
| N      | 2.421996  | 0.385103  | -0.240928 |
| H      | 2.452546  | -0.65005  | -0.394173 |

**P<sub>ME</sub>**

| Symbol | X         | Y         | Z         |
|--------|-----------|-----------|-----------|
| C      | 2.497781  | 0.410419  | 1.147381  |
| O      | 2.335645  | -2.59566  | -0.172055 |
| N      | -2.886305 | 0.565121  | 0.259013  |
| H      | -2.782027 | -0.101474 | -0.546983 |
| H      | -1.879834 | 0.591434  | 0.54987   |
| C      | -3.312569 | 1.893961  | -0.243856 |
| H      | -3.33398  | 2.579405  | 0.608229  |
| H      | -4.332149 | 1.789089  | -0.624862 |
| C      | -3.71434  | -0.043978 | 1.332817  |
| H      | -4.733808 | -0.132328 | 0.946828  |
| H      | -3.724058 | 0.655481  | 2.173653  |
| C      | -3.131708 | -1.394523 | 1.721101  |
| H      | -3.112709 | -2.077119 | 0.867002  |
| H      | -2.103736 | -1.291999 | 2.079892  |
| H      | -3.736745 | -1.841206 | 2.513181  |
| C      | -2.348959 | 2.356678  | -1.326296 |
| H      | -2.660682 | 3.328557  | -1.714552 |
| H      | -1.335724 | 2.446185  | -0.92404  |
| H      | -2.315167 | 1.637155  | -2.148773 |
| S      | -0.478911 | -1.22371  | -0.713117 |
| O      | 0.721455  | -1.223442 | -1.757592 |
| O      | -1.696143 | -1.032122 | -1.538277 |
| O      | -0.2578   | -0.036823 | 0.173728  |
| H      | 1.508164  | -2.999252 | 0.150552  |
| O      | -0.438788 | -2.492572 | 0.020123  |
| H      | 2.647372  | -2.053896 | 0.576449  |
| O      | 2.736404  | -0.548073 | 1.831515  |
| C      | 1.599571  | 2.481928  | 0.60338   |
| H      | 0.577969  | 2.854749  | 0.698312  |
| H      | 2.306406  | 3.276744  | 0.863008  |
| C      | 1.878142  | 1.933658  | -0.79669  |
| H      | 1.000938  | 1.452616  | -1.231492 |
| H      | 2.267693  | 2.709084  | -1.457165 |
| H      | 1.5036    | -1.666554 | -1.297061 |
| O      | 1.743458  | 1.435577  | 1.559535  |
| S      | 3.133989  | 0.661431  | -0.503007 |

**TS1<sub>EDT</sub>**

| Symbol | X         | Y         | Z         |
|--------|-----------|-----------|-----------|
| C      | -1.333668 | -1.364864 | 1.271593  |
| O      | -0.504585 | -2.263277 | 1.282917  |
| N      | 3.295095  | 1.042446  | 0.511367  |
| H      | 3.47464   | 0.487351  | -0.346213 |

|   |           |           |           |   |           |           |           |
|---|-----------|-----------|-----------|---|-----------|-----------|-----------|
| H | 1.455197  | 0.514084  | 0.107792  | H | 2.256406  | 0.943046  | 0.576635  |
| C | 3.358194  | 0.792845  | 0.840163  | C | 3.923868  | 0.385949  | 1.693165  |
| H | 3.236788  | 1.871322  | 0.977276  | H | 3.675533  | 0.996424  | 2.565164  |
| H | 4.370668  | 0.598574  | 0.476284  | H | 5.006521  | 0.418031  | 1.544693  |
| C | 2.583446  | 1.102333  | -1.537617 | C | 3.655271  | 2.466078  | 0.265184  |
| H | 3.656441  | 1.164458  | -1.739199 | H | 4.739493  | 2.509803  | 0.132296  |
| H | 2.198941  | 2.114556  | -1.38148  | H | 3.394972  | 3.02338   | 1.168683  |
| C | 1.849389  | 0.365094  | -2.647201 | C | 2.905529  | 2.976486  | -0.955426 |
| H | 2.293039  | -0.61724  | -2.826337 | H | 3.159126  | 2.392875  | -1.844461 |
| H | 0.79664   | 0.202606  | -2.39796  | H | 1.824618  | 2.908008  | -0.803643 |
| H | 1.903326  | 0.95017   | -3.568335 | H | 3.165045  | 4.021404  | -1.137099 |
| C | 3.053821  | 0.015624  | 2.110441  | C | 3.402596  | -1.03653  | 1.828755  |
| H | 3.114597  | -1.061711 | 1.931951  | H | 3.63283   | -1.628759 | 0.93816   |
| H | 3.772637  | 0.285611  | 2.88714   | H | 3.871044  | -1.515355 | 2.691253  |
| H | 2.045657  | 0.232863  | 2.471899  | H | 2.317966  | -1.050164 | 1.971972  |
| S | 0.225667  | -1.929345 | -0.256937 | S | 1.173064  | -0.71202  | -1.13638  |
| O | 0.153964  | -0.893809 | 0.815135  | O | 0.77823   | 0.178422  | -0.022356 |
| O | 1.621119  | -2.196603 | -0.653103 | O | 2.464799  | -0.392996 | -1.738817 |
| O | -0.704279 | -1.657593 | -1.353943 | O | 0.06297   | -0.779655 | -2.161701 |
| H | -1.192831 | -3.232692 | 0.609514  | H | 0.587354  | -2.309888 | 0.155253  |
| O | -0.237224 | -3.313405 | 0.428053  | O | 1.314718  | -2.166331 | -0.543365 |
| H | -2.604116 | -0.251006 | -1.843982 | H | -0.989415 | -1.052461 | -1.568037 |
| O | -2.204531 | 0.320382  | 2.013225  | O | -1.810207 | -0.511085 | 1.954393  |
| C | -1.322121 | 1.486799  | -0.914359 | C | -2.908692 | 0.365246  | -0.559455 |
| H | -0.861596 | 0.600112  | -0.48053  | H | -2.158941 | 0.957754  | -0.028839 |
| H | -0.723597 | 1.815421  | -1.769519 | H | -3.01258  | 0.74851   | -1.577562 |
| C | -1.387631 | 2.59762   | 0.125296  | C | -4.241653 | 0.407981  | 0.172172  |
| H | -1.519602 | 3.580203  | -0.33397  | H | -5.008343 | -0.123954 | -0.397398 |
| H | -2.204766 | 2.438106  | 0.830047  | H | -4.153591 | -0.063654 | 1.152227  |
| S | 0.169898  | 2.684993  | 1.089263  | S | -4.867085 | 2.112592  | 0.371589  |
| H | -0.06608  | 1.553049  | 1.778691  | H | -3.925883 | 2.500589  | 1.249204  |
| S | -2.991983 | 0.981991  | -1.47048  | S | -2.292813 | -1.349495 | -0.640607 |

| <b>I<sub>2</sub>EDT</b> |           |           |           | <b>TS<sub>2</sub>EDT</b> |           |           |           |
|-------------------------|-----------|-----------|-----------|--------------------------|-----------|-----------|-----------|
| Symbol                  | X         | Y         | Z         | Symbol                   | X         | Y         | Z         |
| C                       | 3.210643  | -1.449896 | -0.352947 | C                        | 3.173078  | -0.43163  | -0.332807 |
| O                       | 2.462352  | -2.353608 | -0.950983 | O                        | 2.329276  | -0.62466  | -1.59802  |
| N                       | -3.745195 | 0.444779  | 0.153558  | N                        | -3.516576 | -0.317978 | 0.440634  |
| H                       | -2.90465  | 0.431706  | 0.773158  | H                        | -3.360907 | -0.091104 | -0.562181 |
| H                       | -3.360297 | -0.143065 | -0.626524 | H                        | -2.575404 | -0.074986 | 0.820097  |
| C                       | -4.879109 | -0.25631  | 0.807745  | C                        | -4.550428 | 0.588126  | 1.009053  |
| H                       | -5.70234  | -0.287565 | 0.088727  | H                        | -4.631168 | 0.359169  | 2.074858  |
| H                       | -5.191609 | 0.349595  | 1.662783  | H                        | -5.500705 | 0.338727  | 0.529673  |
| C                       | -3.992465 | 1.826373  | -0.333988 | C                        | -3.745427 | -1.782921 | 0.598543  |
| H                       | -4.334038 | 2.420469  | 0.518263  | H                        | -4.701465 | -2.013667 | 0.121027  |
| H                       | -4.804156 | 1.773421  | -1.064735 | H                        | -3.837825 | -1.97841  | 1.670114  |
| C                       | -2.712886 | 2.381666  | -0.942556 | C                        | -2.590683 | -2.552608 | -0.024809 |
| H                       | -1.915382 | 2.427314  | -0.195262 | H                        | -2.501477 | -2.333793 | -1.092918 |
| H                       | -2.363724 | 1.74866   | -1.763502 | H                        | -1.638868 | -2.296103 | 0.449816  |
| H                       | -2.892296 | 3.388583  | -1.325621 | H                        | -2.760841 | -3.624763 | 0.09442   |
| C                       | -4.435582 | -1.650077 | 1.226472  | C                        | -4.147405 | 2.033754  | 0.763562  |
| H                       | -3.599927 | -1.59726  | 1.929915  | H                        | -4.047234 | 2.23533   | -0.306512 |
| H                       | -5.264031 | -2.174796 | 1.706801  | H                        | -4.904333 | 2.704363  | 1.175265  |



|   |           |           |           |   |           |           |           |
|---|-----------|-----------|-----------|---|-----------|-----------|-----------|
| H | -4.107772 | -2.229834 | 0.359267  | H | -3.188757 | 2.256887  | 1.240155  |
| S | -0.867292 | -0.862245 | -0.385916 | S | -0.766869 | 0.383824  | -1.052497 |
| O | -2.034928 | -1.053128 | -1.271486 | O | 0.132188  | 1.579314  | -1.481419 |
| O | -1.214867 | -0.159374 | 0.871855  | O | -2.052769 | 0.50949   | -1.74243  |
| O | 0.044425  | 0.173889  | -1.221635 | O | -0.883692 | 0.382191  | 0.418147  |
| H | 1.513754  | -2.322637 | -0.658988 | H | 1.076689  | -0.818296 | -1.546588 |
| O | -0.081586 | -2.083496 | -0.174267 | O | -0.065755 | -0.883153 | -1.546398 |
| H | 0.685484  | 0.603344  | -0.6097   | H | 2.884199  | -1.163416 | -2.188544 |
| O | 4.340414  | -1.193306 | -0.671944 | O | 4.35498   | -0.630587 | -0.520843 |
| C | 3.636796  | 0.6876    | 1.286629  | C | 2.635047  | -0.141493 | 2.263013  |
| H | 3.410551  | 1.134689  | 2.25922   | H | 2.165497  | -0.437617 | 3.204632  |
| H | 4.619112  | 0.213157  | 1.335658  | H | 3.720128  | -0.109252 | 2.401672  |
| C | 3.649663  | 1.738229  | 0.183052  | C | 2.100598  | 1.214356  | 1.797333  |
| H | 4.428078  | 2.474875  | 0.397165  | H | 1.008555  | 1.212103  | 1.827084  |
| H | 3.864503  | 1.257633  | -0.772686 | H | 2.485681  | 2.014216  | 2.436246  |
| S | 2.027807  | 2.590286  | 0.100047  | H | 1.011875  | 1.604186  | -0.908522 |
| H | 2.266375  | 3.262407  | -1.036954 | S | 2.666706  | 1.513305  | 0.093127  |
| S | 2.394478  | -0.612884 | 1.038953  | S | 2.23453   | -1.383629 | 1.00938   |

**P<sub>EDT</sub>**

| Symbol | X         | Y         | Z         |
|--------|-----------|-----------|-----------|
| C      | -2.258983 | -0.13986  | 1.137443  |
| O      | -1.400285 | 3.06432   | 0.542059  |
| N      | 2.603416  | -1.098927 | 0.136056  |
| H      | 2.699605  | -0.444781 | -0.675224 |
| H      | 1.669204  | -0.766915 | 0.484661  |
| C      | 2.494955  | -2.495225 | -0.353094 |
| H      | 2.335341  | -3.136686 | 0.518097  |
| H      | 3.452213  | -2.762132 | -0.809348 |
| C      | 3.658027  | -0.826071 | 1.147872  |
| H      | 4.615316  | -1.120982 | 0.708653  |
| H      | 3.458223  | -1.474217 | 2.005749  |
| C      | 3.633926  | 0.646276  | 1.52872   |
| H      | 3.817855  | 1.283146  | 0.658992  |
| H      | 2.662419  | 0.930588  | 1.942118  |
| H      | 4.405151  | 0.84425   | 2.276434  |
| C      | 1.341753  | -2.586062 | -1.339792 |
| H      | 1.244941  | -3.608056 | -1.71317  |
| H      | 0.411819  | -2.295572 | -0.841872 |
| H      | 1.497262  | -1.909342 | -2.184974 |
| S      | 0.906111  | 1.435419  | -0.675376 |
| O      | -0.317792 | 1.864629  | -1.608608 |
| O      | 1.908949  | 0.873283  | -1.606812 |
| O      | 0.36462   | 0.370881  | 0.227893  |
| H      | -0.476683 | 3.299328  | 0.747474  |
| O      | 1.346945  | 2.62238   | 0.062291  |
| H      | -1.62838  | 2.37062   | 1.187073  |
| O      | -2.141949 | 0.597618  | 2.077856  |
| C      | -2.382511 | -2.272262 | -0.479033 |
| H      | -1.772492 | -3.085419 | -0.882135 |
| H      | -3.420368 | -2.607612 | -0.41046  |
| C      | -2.268212 | -1.021412 | -1.344229 |
| H      | -1.227383 | -0.765613 | -1.56353  |

|   |           |           |           |
|---|-----------|-----------|-----------|
| H | -2.825238 | -1.137104 | -2.276508 |
| H | -0.958886 | 2.327016  | -0.992619 |
| S | -2.990456 | 0.355156  | -0.414261 |
| S | -1.764497 | -1.867151 | 1.184851  |
